# Supplementary material for: Jurisdictional, socioeconomic and gender inequalities in child health and development: analysis of a national census of 5-year-olds in Australia
Source: PubMed Central journal article supplement — BMJ Open. 2012 Sep 4;2(5):e001075. doi: 10.1136/bmjopen-2012-001075 (PMC3437432; doi:10.1136/bmjopen-2012-001075), 2012-09-04
Supplement: bmjopen-2012-001075.draft_revisions.pdf [file bmjopen-2012-001075.draft_revisions.pdf]

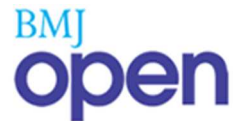

**Jurisdictional, socioeconomic and gender inequalities in  
child health and development: Analysis of a national census  
of 5 year olds in Australia.**

|                                 |                                                                                                                                                                                                                                                                                                                                                                                                                                                                                                                                                                                                                                                                                                                                                                                                                                                                                                                                                                                                                                                                                                                                                                                                                                                                                                                                                                                                                                                                                            |
|---------------------------------|--------------------------------------------------------------------------------------------------------------------------------------------------------------------------------------------------------------------------------------------------------------------------------------------------------------------------------------------------------------------------------------------------------------------------------------------------------------------------------------------------------------------------------------------------------------------------------------------------------------------------------------------------------------------------------------------------------------------------------------------------------------------------------------------------------------------------------------------------------------------------------------------------------------------------------------------------------------------------------------------------------------------------------------------------------------------------------------------------------------------------------------------------------------------------------------------------------------------------------------------------------------------------------------------------------------------------------------------------------------------------------------------------------------------------------------------------------------------------------------------|
| Journal:                        | <i>BMJ Open</i>                                                                                                                                                                                                                                                                                                                                                                                                                                                                                                                                                                                                                                                                                                                                                                                                                                                                                                                                                                                                                                                                                                                                                                                                                                                                                                                                                                                                                                                                            |
| Manuscript ID:                  | bmjopen-2012-001075                                                                                                                                                                                                                                                                                                                                                                                                                                                                                                                                                                                                                                                                                                                                                                                                                                                                                                                                                                                                                                                                                                                                                                                                                                                                                                                                                                                                                                                                        |
| Article Type:                   | Research                                                                                                                                                                                                                                                                                                                                                                                                                                                                                                                                                                                                                                                                                                                                                                                                                                                                                                                                                                                                                                                                                                                                                                                                                                                                                                                                                                                                                                                                                   |
| Date Submitted by the Author:   | 20-Apr-2012                                                                                                                                                                                                                                                                                                                                                                                                                                                                                                                                                                                                                                                                                                                                                                                                                                                                                                                                                                                                                                                                                                                                                                                                                                                                                                                                                                                                                                                                                |
| Complete List of Authors:       | Brinkman, Sally; The University of Western Australia, Telethon Institute for Child Health Research, Centre for Child Health Research<br>Gialamas, Angela; The University of Adelaide, School of Population Health and Clinical Practice, Discipline of Public Health<br>Rahman, Azizur; The University of Adelaide, School of Population Health and Clinical Practice, Discipline of Public Health<br>Mittinty, Murthy; The University of Adelaide, School of Population Health and Clinical Practice, Discipline of Public Health<br>Gregory, Tess; The University of Western Australia, Telethon Institute for Child Health Research, Centre for Child Health Research<br>Silburn, Sven; Menzies School of Health Sciences,<br>Goldfeld, Sharon; The University of Melbourne, Murdoch Children's Research Institute; Royal Childrens Hospital, Centre for Community Child Health<br>Zubrick, Stephen; The University of Western Australia, Telethon Institute for Child Health Research, Centre for Child Health Research<br>Carr, Vaughan; The University of New South Wales, School of Psychiatry, Faculty of Medicine; Schizophrenia Research Institute,<br>Janus, Magdalena; McMaster University, Offord Centre for Child Studies<br>Hertzman, Clyde; University of British Columbia, Human Early Learning Partnership<br>Lynch, John; University of Adelaide, School of Population Health and Clinical Practice; The University of Bristol, School of Social and Community Medicine |
| <b>Primary Subject Heading</b>: | Public health                                                                                                                                                                                                                                                                                                                                                                                                                                                                                                                                                                                                                                                                                                                                                                                                                                                                                                                                                                                                                                                                                                                                                                                                                                                                                                                                                                                                                                                                              |
| Secondary Subject Heading:      | Epidemiology, Health policy                                                                                                                                                                                                                                                                                                                                                                                                                                                                                                                                                                                                                                                                                                                                                                                                                                                                                                                                                                                                                                                                                                                                                                                                                                                                                                                                                                                                                                                                |
| Keywords:                       | Social Epidemiology, Inequality, Public Health Policy, Child Health and Development, Australia                                                                                                                                                                                                                                                                                                                                                                                                                                                                                                                                                                                                                                                                                                                                                                                                                                                                                                                                                                                                                                                                                                                                                                                                                                                                                                                                                                                             |
|                                 |                                                                                                                                                                                                                                                                                                                                                                                                                                                                                                                                                                                                                                                                                                                                                                                                                                                                                                                                                                                                                                                                                                                                                                                                                                                                                                                                                                                                                                                                                            |

SCHOLARONE™  
Manuscripts

**TITLE:** Jurisdictional, socioeconomic and gender inequalities in child health and development:  
Analysis of a national census of 5 year olds in Australia

**AUTHORS:** Brinkman, S.A.<sup>1,2</sup>, Gialamas, A.<sup>3</sup>, Rahman, A.<sup>3</sup>, Mittinty M.N.<sup>3</sup>, Gregory, T<sup>1</sup>,  
Silburn, S.<sup>1,4</sup>, Goldfeld, S.<sup>5,6</sup>, Zubrick, S.R.<sup>1</sup>, Carr, V.<sup>7,8</sup>, Janus, M.<sup>9</sup>, Hertzman, C.<sup>10</sup>, Lynch J.W.<sup>3,11</sup>

1. Telethon Institute for Child Health Research, Centre for Child Health Research, The University of Western Australia, Perth, Australia.
2. Health Sciences, Curtin University, Perth, Australia.
3. School of Population Health and Clinical Practice, Discipline of Public Health, The University of Adelaide, Adelaide, Australia.
4. Menzies School of Health Sciences, Darwin, Australia.
5. Centre for Community Child Health, Royal Childrens Hospital, Melbourne, Australia.
6. Murdoch Children's Research Institute, The University of Melbourne, Melbourne, Australia.
7. School of Psychiatry, Faculty of Medicine, The University of New South Wales, Sydney, Australia.
8. Schizophrenia Research Institute, Sydney, Australia
9. Offord Centre for Child Studies, McMaster University, Hamilton, Canada.
10. Human Early Learning Partnership, The University of British Columbia, Vancouver, Canada.
11. School of Social and Community Medicine, The University of Bristol, Bristol, UK.

1  
2 **Correspondence concerning this article should be sent to:**  
3

4 Assoc Prof Sally Brinkman  
5

6 Adelaide Branch,  
7

8 Telethon Institute for Child Health Research,  
9

10 Level 8, 31 Flinders Street,  
11

12 ADELAIDE, South Australia 5000.  
13

14 [sallyb@icmr.uwa.edu.au](mailto:sallyb@icmr.uwa.edu.au)  
15

16  
17 Phone: +61 419814800  
18

19 Fax: +61 8 9489 7700  
20  
21  
22  
23

24 **KEY WORDS:** Social Epidemiology, Inequality, Public Health Policy, Child Health and  
25  
26 Development, Australia  
27  
28  
29

30 **WORD COUNT:** 5850.  
31  
32  
33  
34  
35  
36  
37  
38  
39  
40  
41  
42  
43  
44  
45  
46  
47  
48  
49  
50  
51  
52  
53  
54  
55  
56  
57  
58  
59  
60

**ARTICLE SUMMARY BOX:****Article Focus**

- This study presents the first ever population wide census of child development across an entire country; Australia.
- There are large inequalities in child development across jurisdictions and socio-demographic groups, showing that disparities in child development emerge early in life.

**Key Messages**

- High quality population monitoring and data linkage systems are essential to inform progressive universalist policy approaches.
- Jurisdictional differences in child development persist after controlling for socio-economic and demographic factors. Differing jurisdictional policies, and levels of service provision that support children and their families from birth to school age may contribute to inequalities in child development across the country.

**Strengths and limitations**

- These results are based on a developmental census of Australian children, with a large sample of 261,147 children, representing approximately 97.5% of the estimated five-year-old population.
- Further research is needed to understand whether these jurisdictional differences in child development can be attributed to different government policies and service provision.

**STRUCTURED ABSTRACT:**

**Objectives:** Early child development may have important consequences for inequalities in health and wellbeing. This paper explores population level patterns of child development across Australian jurisdictions, considering socioeconomic and demographic characteristics.

**Design:** Census of child development across Australia.

**Setting and participants:** Teachers complete a developmental checklist, the Australian Early Development Index (AEDI), for all children in their first year of fulltime schooling. Between May and July 2009, the AEDI was collected by 14,628 teachers in primary schools (government and non-government) across Australia, providing information on 261,147 children (approximately 97.5% of the estimated five-year-old population).

**Outcome measures:** Level of developmental vulnerability in Australian children for five developmental domains: physical wellbeing, social competence, emotional maturity, language and cognitive skills, and communication skills and general knowledge.

**Results:** The results show demographic and socioeconomic inequalities in child development as well as within and between jurisdiction inequalities. The magnitude of the overall level of inequality in child development and the impact of covariates varies considerably both between and within jurisdiction by sex. For example, the difference in overall developmental vulnerability between the best and worst performing jurisdiction is 12.5% for males and 7.1% for females. Levels of absolute social inequality within jurisdictions range from 8.2% for females and 12.7% for males.

**Conclusions:** The different mix of universal and targeted services provided within jurisdictions from pregnancy to age 5 may contribute to inequality across the country. These results illustrate the potential utility of a developmental census to shed light on the impact of differences in universal and targeted services to support child development by school entry.

## Introduction

Governments are becoming increasingly interested in the early determinants of children's health, development and wellbeing in order to inform services needed to better support children and their families. It is recognised that the opportunities for prevention and public health interventions will be enhanced the more we understand the early pathways to poorer health and development [1] and that to have an impact on health inequalities will require us to address the social determinants of early child health, development and wellbeing [2]. However, appropriate service and systemic improvements for reducing developmental inequalities requires an understanding of the patterns of child health and development across population groups and geographies in order to underpin a progressive universal portfolio of services [3].

Socioeconomic gradients in child health and development mean that providing services primarily to the disadvantaged will not eliminate population health burdens [4]. Children from all social and economic backgrounds may suffer poor health and development, albeit that those in the most disadvantaged circumstances have a disproportionate share of poor health and development. To reduce the steepness of the social gradient in health, actions to influence development must be universal, but be implemented with a scale and intensity that is proportionate to the level of disadvantage [2] – an approach termed progressive or proportionate universalism.

Measuring the developmental effects of proportionate universalism requires substantial effort in the form of establishing early and developmentally relevant baseline measures with ongoing capacity to monitor progress over time. An added challenge entails demonstrating that improvements in early development, translate into improvements in later human capability [5]. This requires longitudinal measurement to ascertain lifecourse developmental effects. An essential starting point is quantification of the overall level, and the absolute and relative inequality in child health and development across the population.

The global challenge to improve early child health and development requires an instrument that can be used across the population, be compared over time for monitoring and is sensitive

1  
2 enough to evaluate programs. A measure used internationally would additionally enable such  
3  
4 comparisons both within and across countries. The current basic health statistics collected early in  
5  
6 life to compare the progress of countries include infant, maternal and child mortality rates,  
7  
8 breastfeeding and immunisation rates [6]. Other measures of progress such as the Programme for  
9  
10 International Student Assessment [7] provide cross-national comparisons of educational  
11  
12 performances and are collected much later in child development. These efforts have contributed  
13  
14 substantially to sustained cross-national financial and programmatic commitments to lift human  
15  
16 development outcomes within nations [8].  
17  
18

19  
20 Notwithstanding the significance of these measures, we should be seeking indicators that not  
21  
22 only determine whether children are surviving but how well populations of children are actually  
23  
24 developing between birth and school entry. This is now recognized by organizations such as the  
25  
26 OECD and the World Bank which are promoting the use of internationally comparable instruments  
27  
28 to measure child development and wellbeing [9, 10]. The implications for monitoring child  
29  
30 development are also highlighted by the United Nations Convention on the Rights of the Child [11]  
31  
32 as each of the signatory countries is responsible for providing children with the opportunities  
33  
34 necessary to develop physical, cognitive, social and emotional capabilities in early life.  
35  
36

37  
38 Transition to school is seen as one of the best stages in a child's life to measure child  
39  
40 development and wellbeing [12-14]. Research has established that children at higher risk for  
41  
42 suboptimal development can be better prepared for initial success at school through early childhood  
43  
44 education, family support, paediatric and allied health care interventions and child health programs  
45  
46 [15]. When children come to school with the developmental capacity to take advantage of the  
47  
48 education system, coupled with a high quality education system, the initial positive effects persist  
49  
50 into adolescence and adulthood [15].  
51  
52

53  
54 In 2007, the Council of Australian Governments endorsed the Australian Early Development  
55  
56 Index (AEDI) as a national progress measure of early childhood health and development [16]. The  
57  
58 AEDI is a population measure of children's development covering five developmental domains:  
59  
60

1 physical health and well-being, social competence, emotional maturity, language and cognitive  
2 skills, and communication skills and general knowledge. The instrument is based on the Canadian  
3 Early Development Instrument and has been used in Australia since 2002 [17]. In 2009 the AEDI  
4 was collected for almost every child across Australia in their first year of full time schooling. This  
5 represents the first effort by any country to conduct a 'child development census' with information  
6 collected on more than 261,000 children representing 97.5% of the age-eligible population [18].  
7  
8 The Australian federal government has now committed to repeating the AEDI census every three  
9 years. The monitoring of child development and wellbeing over time and across the whole  
10 population enables local communities to determine if they are making improvements and fosters the  
11 relative comparison of communities and populations subgroups [19]. This commitment to tracking  
12 and reporting early childhood outcomes across the entire population, underlines the federal  
13 government's leadership role in providing communities and governments with evidence-based  
14 information for policy and service evaluation.  
15  
16  
17  
18  
19  
20  
21  
22  
23  
24  
25  
26  
27  
28  
29  
30  
31  
32

### 33 *The Australian Context*

34  
35 Australia is a federated democracy that has three tiers of government: federal, state and  
36 local. Funding towards early child health and development at a federal level is delivered through  
37 various departments including the Department of Education, Employment and Workplace  
38 Relations, Department of Families, Housing, Community Services and Indigenous Affairs and the  
39 Department of Health and Ageing. The federal government has annual contract negotiations,  
40 passing monies over to the jurisdictions, for them to deliver agreed services and to assist with  
41 national health reform.  
42  
43  
44  
45  
46  
47  
48  
49

50 Although the six states join together to form the Commonwealth of Australia, they are  
51 constituted with the power to make laws and policies through their own legislative, executive and  
52 judicial functions. Australia also has two principal territories, the Australian Capital Territory  
53 (ACT) and the Northern Territory (NT), which constitutionally are directly subject to the  
54  
55  
56  
57  
58  
59  
60



1 Commonwealth government. These eight State and Territory Governments provide the bulk of early  
2 childhood services, with differing levels and approaches to service delivery. Local governments  
3 make up the third tier and are established by state and territory governments to take responsibility  
4 for a number of community based services. Of the total health expenditure in Australia, 42.7% is  
5 contributed by the federal government, 25.3% by state, territory and local governments, and the  
6 remainder is covered by individuals, non-government agencies and private industry [20].  
7  
8  
9  
10  
11  
12  
13  
14

15 Australia is the earth's biggest island and the sixth-largest country in the world in land area.  
16 It is a culturally diverse society with a population of more than 22 million [21]. Australia's  
17 population includes Aboriginal and Torres Strait Islander peoples and migrants from some 200  
18 countries with Indigenous Australian peoples representing 2.5% of the total population [22]. In  
19 over 60 years of planned post-war migration, Australia has accepted more than 6.5 million migrants  
20 and in the most recent census (2006), 3.1 million people (16% of the population) were reported to  
21 speak a language other than English at home [23]. The majority of the population lives in the cities  
22 mainly located around the coast, however many live in rural and remote areas ranging from dry arid  
23 land to tropical and a few live in what are arguably some of the most remote and untouched areas of  
24 the world.  
25  
26  
27  
28  
29  
30  
31  
32  
33  
34  
35  
36

37 Australia's income inequality has been steadily increasing [24] but it ranks second after  
38 Norway on the most recent Human Development Index (HDI) results [25]. The plight of the  
39 Aboriginal and Torres Strait Islander population however remains one of Australia's most  
40 concerning inequalities. Separate HDI estimates for Australian Aboriginal and Torres Strait  
41 Islanders ranked this subpopulation at about 104<sup>th</sup> – between Cape Verde and China [26]. The most  
42 recent report from Australia's Productivity Commission notes that there has been little change for  
43 Aboriginal people on measures of literacy and numeracy, most health indicators and in proportions  
44 living in overcrowded housing. Rates of child abuse and neglect substantiations and adult  
45 imprisonment have increased for Aboriginal people, but there has been recent improvement in  
46  
47  
48  
49  
50  
51  
52  
53  
54  
55  
56  
57  
58  
59  
60

1 juvenile detention rates [22]. Low birth weight rates are two and a half times higher than for  
2 children born to non-Aboriginal mothers [22].  
3  
4

5  
6 The multicultural context of Australia, its geographical size and climatic variation, along  
7 with multi-tiered political governance and service delivery highlights the complexity faced when  
8 aiming to both understand and reduce inequality in child health and development. The objective of  
9 this study is to use the national AEDI census data to examine jurisdictional, geographic,  
10 socioeconomic and gender inequality in child health and development across Australia.  
11  
12  
13  
14  
15  
16  
17  
18  
19

## 20 **Methods**

21 To support broad access to the AEDI data the Australian Government through the  
22 Department of Education, Employment and Workplace Relations made available in 2011 a  
23 Confidentialised Unit Record File (CURF) for researchers. In order to protect the privacy of  
24 individual children the data were confidentialised by removing the child's name and date of birth,  
25 restricting potentially identifying information, and where the information was considered to present  
26 a risk of identifying individuals the data were restricted and/or "perturbed" however details of this  
27 process conducted by the Australian Bureau of Statistics are confidential [27]. This, in combination  
28 with the unavailability of a SEIFA indicator for the Northern Territory resulted in the removal of  
29 the territory from the analytical models. The AEDI CURF does not include the individual items  
30 that comprise the AEDI and only provides categorised data on the summary AEDI domain scores  
31 and a limited range of socio-demographic characteristics such as state of residence, gender, and  
32 remoteness [28].  
33  
34  
35  
36  
37  
38  
39  
40  
41  
42  
43  
44  
45  
46  
47  
48  
49  
50

### 51 *Study population*

52  
53 Between May and July 2009, all schools (government and non-government) across all states  
54 and territories in Australia participated in the AEDI. As shown in Figure 1, information for 261,147  
55 children (approximately 97.5% of the estimated five-year-old population) in their first year of full-  
56  
57  
58  
59  
60

1  
2 time school was collected by 14,628 teachers across Australia. Of those, 89.6% (n=233,960)  
3  
4 contributed to the analysis with 117,937 males and 116,023 females, and their characteristics are  
5  
6 provided in Table 1. The vast majority of children live in major cities, with the most populous  
7  
8 states being New South Wales, Victoria and Queensland. Four per cent of the children were of  
9  
10 Aboriginal or Torres Strait Islander descent and approximately 12% of all children spoke English as  
11  
12 a second language. The AEDI was not completed for children whose parent/guardian opted-out or  
13  
14 in the situation where the teacher had known the child for less than one month and felt that they  
15  
16 didn't know the child well enough to complete the checklist [18].  
17  
18  
19  
20  
21  
22  
23  
24  
25  
26  
27  
28  
29  
30  
31  
32  
33  
34  
35  
36  
37  
38  
39  
40  
41  
42  
43  
44  
45  
46  
47  
48  
49  
50  
51  
52  
53  
54  
55  
56  
57  
58  
59  
60

Table 1: Socio-demographic characteristics of children for whom an AEDI was completed and contributed to the analysis

| Characteristics                          | Male (n=117,937)<br>n (column %) | Female (n=116,023)<br>n (column %) |
|------------------------------------------|----------------------------------|------------------------------------|
| <b>State</b>                             |                                  |                                    |
| New South Wales                          | 41,465 (35.2)                    | 40,657 (35.0)                      |
| Victoria                                 | 28,286 (23.9)                    | 28,400 (24.5)                      |
| Tasmania                                 | 2,855 (2.4)                      | 2,785 (2.4)                        |
| Australian Capital Territory             | 2,114 (1.8)                      | 2,021 (1.7)                        |
| South Australia                          | 7,282 (6.2)                      | 7,221 (6.2)                        |
| Western Australia                        | 13,112 (11.1)                    | 12,633 (10.9)                      |
| Queensland                               | 22,823 (19.4)                    | 22,306 (19.2)                      |
| <b>Aboriginal Torres Strait Islander</b> |                                  |                                    |
| Yes                                      | 4,668 (4.0)                      | 4,766 (4.1)                        |
| No                                       | 113,269 (96.0)                   | 111,257 (96.0)                     |
| <b>English as a second language</b>      |                                  |                                    |
| Yes                                      | 14,865 (12.6)                    | 14,043 (12.1)                      |
| No                                       | 103,072 (87.4)                   | 101,980 (87.9)                     |
| <b>Mean SEIFA (<math>\pm</math>SD)</b>   | 6.29 (2.98)                      | 6.27 (2.99)                        |

## *Outcome*

The AEDI is the outcome measure used to assess children's development. The Index is an adapted version of the Canadian Early Development Instrument [16, 29]. Both the Canadian and the Australian version of the instrument have been shown to have sound validity [29-34]. The AEDI is an 95-item, teacher completed questionnaire designed to measure five domains of child development: Physical health and wellbeing, Language and cognitive skills, Emotional maturity, Social competence, and Communication skills and general knowledge [35].

Teachers complete the AEDI for each child in their class on the basis of their knowledge of the children. Children are not required to be present when the information is entered into the secure web-based data entry system. Each item on the checklist is either dichotomous (yes/no) or a Likert scale response (e.g. very good/good; average; poor/very poor). The data were collected across the country over a three month time period (May to July 2009).

Domain scores range between 0 and 10 and are calculated as a mean score of all valid answers. Higher scores indicate a higher level of development for that domain. Children who score below the 10<sup>th</sup> percentile of the national AEDI population for an individual domain (e.g. emotional maturity) are categorized as 'developmentally vulnerable' with all other children categorized as 'not developmentally vulnerable' for that domain. The National Progress Measure is the proportion of children who are developmentally vulnerable on one or more of the five domains.

## *Covariates*

### *Index of Relative Socio-economic Advantage and Disadvantage*

The Australian Bureau of Statistics releases on the basis of census information a series of four Socio-Economic Indices For Areas (SEIFA). The index utilised for this manuscript was the Index of Relative Socio-economic Advantage and Disadvantage [36]. The index reflects the average socio-economic status of people and households in the area, not individual people or households. SEIFA has been applied to the AEDI data file on the basis of the child's suburb

1 (neighbourhood) of residence [28]. In the rural and remote areas where suburbs do not exist,  
2  
3 SEIFA was applied at the smallest level of geography on the basis of their address details provided  
4  
5 by the teacher upon completing the AEDI [28]. The SEIFA index is calculated via Principal  
6  
7 Components Analysis using 21 indicator variables. The index is ordinal and ranges from around  
8  
9 200 to 1200 with a mean of 1000 and standard deviation of 100, however, this score has been  
10  
11 categorised to deciles as part of the confidentialisation process undertaken by the ABS with the  
12  
13 lowest decile representing the most disadvantaged areas [36].  
14

#### 15 *Aboriginal and Torres Strait Islander and English as a Second Language.*

16  
17  
18  
19  
20  
21  
22  
23  
24  
25  
26  
27  
28  
29  
30  
31  
32  
33  
34  
35  
36  
37  
38  
39  
40  
41  
42  
43  
44  
45  
46  
47  
48  
49  
50  
51  
52  
53  
54  
55  
56  
57  
58  
59  
60  
Aboriginal and Torres Strait Islander (ATSI) background and English as a Second Language  
(ESL) are collected with the AEDI. ATSI was recorded on the basis of school enrolment records.  
Teachers classified children as having English as a Second Language where English was not their  
first language and where they needed additional instruction in English or where their English was  
not yet proficient.

#### 32 *Statistical analyses*

35  
36  
37  
38  
39  
40  
41  
42  
43  
44  
45  
46  
47  
48  
49  
50  
51  
52  
53  
54  
55  
56  
57  
58  
59  
60  
A dichotomous variable was created indicating whether the child was in the bottom 10<sup>th</sup>  
percentile (developmentally vulnerable) or not for each of the five domains, and developmentally  
vulnerable on one or more domains. Children, who were identified as having special needs, were  
three years old, or had less than four valid domain scores (n=11,484) were not included in the  
calculation of developmentally vulnerable on one or more domain [18, 37].

46  
47  
48  
49  
50  
51  
52  
53  
54  
55  
56  
57  
58  
59  
60  
As our primary interest was to investigate jurisdictional and socioeconomic inequality of  
child developmental vulnerability we utilised two nested fixed-effects logistic regression models.  
Model 1 considers only state as the covariate. For being developmentally vulnerable on one or more  
domain (DV1<sup>+</sup>) variable the model is:

$$\text{logit}\left[p_{ij}(dv1^+ = 1)\right] = \alpha + \beta_j(\text{state}_{ij}), \quad (1)$$

where  $p_{ij}(dv1^+ = 1)$  is the probability of a child being developmentally vulnerable on one or more domains for the  $i^{\text{th}}$  observation in the  $j^{\text{th}}$  class of the state variable,  $\alpha$  is the intercept and  $\beta_j$  is the coefficient for the state. Model 2 considers three additional covariates for jurisdictional variation of child vulnerability. Again for same dependent variable  $DV1^+$  the full model is defined as,

$$\text{logit}\left[p_{ij}(dv1^+ = 1)\right] = \alpha + \beta_{1j}(\text{state}_{ij}) + \beta_{2j}(\text{ATSI}_{ij}) + \beta_{3j}(\text{ESL}_{ij}) + \beta_{4j}(\text{SEIFA}_{ij}), \quad (2)$$

where  $\beta_{1j}$ ,  $\beta_{2j}$ ,  $\beta_{3j}$ , and  $\beta_{4j}$  are the coefficients for four covariates: state, Aboriginal and Torres Strait Islander (ATSI) status, English as a second language (ESL) status and SEIFA, respectively. Models are estimated separately for males and females. Similar models are used for each of the domain specific outcomes.

To examine socioeconomic inequalities in developmental vulnerability we computed the slope index of inequality (SII) [38, 39]. In this circumstance we use the SII to measure the absolute developmental vulnerability gap between the lowest and highest SEIFA deciles within jurisdictions in Australia. The computational process of creating the SII is:

- 1) Compute the proportion of total children ( $t_i$ ) for the ordered (lowest to highest) classes of SEIFA deciles ( $i = 1, 2, \dots, 10$ );
- 2) Compute the cumulative proportion of children for each SEIFA class ( $c_i$ ) and then give a score based on the midpoint of its range in the cumulative distribution in the children (*i.e.*  $x_i = c_{i-1} + t_i/2$ );
- 3) Compute the proportion of developmentally vulnerable children for  $i^{\text{th}}$  class ( $r_i$ ); and

1  
2 4) Values of  $r_i$  then are plotted against the values of  $x_i$  and a regression line is fitted to the data.  
3

4 Thus, the SII is the absolute value of the slope coefficient of the regression line from lowest  
5  
6 to highest SEIFA score.  
7

8  
9 All analyses were carried out using SAS software Version 9.2.  
10

## 11 12 13 **Results**

14  
15 Table 2 shows the association between geographic and socio-demographic characteristics  
16 and the probability of being developmentally vulnerable on one or more AEDI domain by sex.  
17  
18 Aboriginal and Torres Strait Islander children were more likely to be developmentally vulnerable  
19 compared to non-ATSI children (OR 2.16 males; 95% CI, 2.03-2.30 OR 2.42 females; 95% CI,  
20 2.27-2.58); those for whom English was not their first language were more likely to be  
21 developmentally vulnerable (OR 2.06 males; 95% CI, 1.99-2.14 OR 2.43 females; 95% CI, 2.33-  
22 2.54); and for every decile increase in SEIFA there was a decreasing odds of being developmentally  
23 vulnerable (OR 0.92 males; 95% CI, 0.91-0.92 and OR 0.91 females; 95% CI, 0.90-0.91).  
24  
25  
26  
27  
28  
29  
30  
31  
32

33 Model 1 in Table 2 shows that for both sexes, compared to New South Wales (reference  
34 group), children living in Queensland had the highest odds (OR 1.70 males; 95% CI, 1.64-1.75 and  
35 OR females 1.42; 95% CI, 1.37-1.49) of being developmentally vulnerable followed by children  
36 living in Western Australia, South Australia, Australian Capital Territory, Tasmania and Victoria.  
37  
38 After adjusting for ATSI, ESL and SEIFA (Model 2) Queensland children for both sexes remained  
39 the most developmentally vulnerable (OR 1.80 males; 95% CI, 1.74-1.87 and OR females 1.52;  
40 95% CI, 1.46-1.59). However, after adjustment, compared to Model 1, there was a shift in the  
41 ranking of developmental vulnerability by jurisdiction, with the odds of vulnerability increasing  
42 substantially for children living in the Australian Capital Territory and Western Australia.  
43  
44  
45  
46  
47  
48  
49  
50  
51  
52  
53  
54  
55  
56  
57  
58  
59  
60



Table 2: Odd ratios (95% CI) estimates for children developmentally vulnerable on one or more domains by geographic and sociodemographic characteristics in Australia

|                                                      | Developmentally vulnerable on one or more domains |                    |                    |                    |
|------------------------------------------------------|---------------------------------------------------|--------------------|--------------------|--------------------|
|                                                      | Male (N=117937)                                   |                    | Female (N=116023)  |                    |
|                                                      | Model 1                                           | Model 2            | Model 1            | Model 2            |
| <i>Geographic variables</i>                          |                                                   |                    |                    |                    |
| State                                                |                                                   |                    |                    |                    |
| New South Wales                                      | reference                                         |                    |                    |                    |
| Australian Capital Territory                         | 1.10 (1.00 - 1.21)                                | 1.55 (1.41 - 1.71) | 0.94 (0.83 - 1.07) | 1.42 (1.25 - 1.61) |
| Queensland                                           | 1.70 (1.64 - 1.75)                                | 1.80 (1.74 - 1.87) | 1.42 (1.37 - 1.49) | 1.52 (1.46 - 1.59) |
| South Australia                                      | 1.14 (1.08 - 1.20)                                | 1.11 (1.04 - 1.17) | 1.01 (0.95 - 1.09) | 0.97 (0.90 - 1.04) |
| Tasmania                                             | 1.10 (1.02 - 1.20)                                | 1.04 (0.96 - 1.14) | 0.92 (0.83 - 1.03) | 0.88 (0.79 - 0.98) |
| Victoria                                             | 0.98 (0.94 - 1.01)                                | 1.06 (1.02 - 1.10) | 0.88 (0.85 - 0.92) | 0.98 (0.94 - 1.02) |
| Western Australia                                    | 1.26 (1.21 - 1.32)                                | 1.38 (1.32 - 1.44) | 1.12 (1.06 - 1.18) | 1.24 (1.17 - 1.31) |
| <i>Sociodemographic variables</i>                    |                                                   |                    |                    |                    |
| Aboriginal and Torres Strait Islander                |                                                   |                    |                    |                    |
| No                                                   | reference                                         |                    |                    |                    |
| Yes                                                  |                                                   | 2.16 (2.03 - 2.30) |                    | 2.42 (2.27 - 2.58) |
| English second language                              |                                                   |                    |                    |                    |
| No                                                   | reference                                         |                    |                    |                    |
| Yes                                                  |                                                   | 2.06 (1.99 - 2.14) |                    | 2.43 (2.33 - 2.54) |
| Socioeconomic advantage & disadvantage index (SEIFA) |                                                   |                    |                    |                    |
|                                                      |                                                   | 0.92 (0.91 - 0.92) |                    | 0.91 (0.90 - 0.91) |

1  
2  
3  
4  
5  
6  
7  
8  
9  
10  
11  
12  
13  
14  
15  
16  
17  
18  
19  
20  
21  
22  
23  
24  
25  
26  
27  
28  
29  
30  
31  
32  
33  
34  
35  
36  
37  
38  
39  
40  
41  
42  
43  
44  
45  
46  
47  
48  
49  
50  
51  
52  
53  
54  
55  
56  
57  
58  
59  
60

Results presented in Tables 3 and 4 show the association between geographic and socio-demographic characteristics and the probability of being developmentally vulnerable on each AEDI domain by sex. The general pattern showing large jurisdictional differences after controlling for the covariates is consistent across each of the five developmental domains with children in Queensland and the Australian Capital Territory showing higher vulnerability compared to children living in the other jurisdictions. In Queensland, when looking across the five domains, there is little difference found between the odds ratios in Models 1 and 2 for physical health and wellbeing, social competence and emotional maturity. However, controlling for the covariates increases the odds of vulnerability for both language and cognitive and communication and general skills. This pattern is consistent across males and females. Contrary to this, children living in the Australian Capital Territory show increased odds across all five developmental domains when controlling for covariates.

For all five domains, both Aboriginal and Torres Strait Islander (ATSI) and English as a Second Language (ESL) children have increased odds of vulnerability compared to non-ATSI and non-ESL children respectively. It is noteworthy that inequality between ATSI and non-ATSI children is greater for females than for males. For instance, on the physical health and wellbeing domain, the odds ratio for male ATSI children is 1.81 (CI 1.68-1.95) compared with 2.38 for female ATSI children (CI 2.19-2.58). For ATSI children the greatest inequality when compared to non-ATSI is for the Language and cognitive development domain (OR 2.59 males; 95% CI, 2.42-2.78 and OR females 3.01; 95% CI, 2.78-3.25). For children with ESL status the highest ORs were found for the Communication skills and general knowledge domain with 4.19 (95% CI, 4.01-4.37) for males and 5.16 (95% CI, 4.89-5.44) for females.

Table 3: Odd ratios (95% CI) for male children developmentally vulnerable on each domain by jurisdiction and sociodemographic characteristics (N=117937)

| Developmentally vulnerable on each sub-domain        |                             |                       |                       |                       |                       |                       |                             |                       |                                |                       |
|------------------------------------------------------|-----------------------------|-----------------------|-----------------------|-----------------------|-----------------------|-----------------------|-----------------------------|-----------------------|--------------------------------|-----------------------|
|                                                      | Physical health & wellbeing |                       | Social competence     |                       | Emotional maturity    |                       | Language & cognitive skills |                       | Communication & general skills |                       |
|                                                      | Model 1                     | Model 2               | Model 1               | Model 2               | Model 1               | Model 2               | Model 1                     | Model 2               | Model 1                        | Model 2               |
| State                                                |                             |                       |                       |                       |                       |                       |                             |                       |                                |                       |
| New South Wales (r)                                  |                             |                       |                       |                       |                       |                       |                             |                       |                                |                       |
| Australian Capital Territory                         | 1.20<br>(1.05 - 1.37)       | 1.62<br>(1.42 - 1.86) | 1.07<br>(0.94 - 1.22) | 1.44<br>(1.26 - 1.64) | 1.21<br>(1.07 - 1.38) | 1.57<br>(1.37 - 1.78) | 1.02<br>(0.87 - 1.21)       | 1.72<br>(1.45 - 2.04) | 1.04<br>(0.90 - 1.19)          | 1.62<br>(1.40 - 1.86) |
| Queensland                                           | 1.39<br>(1.32 - 1.45)       | 1.37<br>(1.30 - 1.44) | 1.50<br>(1.43 - 1.57) | 1.52<br>(1.45 - 1.59) | 1.60<br>(1.52 - 1.67) | 1.57<br>(1.50 - 1.65) | 3.27<br>(3.11 - 3.43)       | 3.46<br>(3.29 - 3.64) | 1.27<br>(1.21 - 1.33)          | 1.52<br>(1.44 - 1.60) |
| South Australia                                      | 1.21<br>(1.12 - 1.30)       | 1.12<br>(1.04 - 1.21) | 1.22<br>(1.13 - 1.31) | 1.15<br>(1.07 - 1.24) | 1.48<br>(1.38 - 1.59) | 1.38<br>(1.29 - 1.49) | 1.02<br>(0.93 - 1.12)       | 0.94<br>(0.85 - 1.04) | 0.89<br>(0.82 - 0.97)          | 0.94<br>(0.86 - 1.02) |
| Tasmania                                             | 1.19<br>(1.06 - 1.33)       | 1.03<br>(0.92 - 1.16) | 1.07<br>(0.95 - 1.20) | 0.97<br>(0.86 - 1.09) | 1.25<br>(1.12 - 1.40) | 1.10<br>(1.98 - 1.23) | 1.48<br>(1.30 - 1.67)       | 1.30<br>(1.14 - 1.48) | 0.80<br>(0.70 - 0.91)          | 0.93<br>(0.81 - 1.06) |
| Victoria                                             | 0.90<br>(0.86 - 0.95)       | 0.95<br>(0.90 - 0.99) | 0.98<br>(0.93 - 1.02) | 1.03<br>(0.99 - 1.08) | 1.15<br>(1.09 - 1.20) | 1.19<br>(1.13 - 1.25) | 1.06<br>(1.00 - 1.12)       | 1.18<br>(1.12 - 1.25) | 0.93<br>(0.89 - 0.98)          | 1.08<br>(1.02 - 1.13) |
| Western Australia                                    | 1.23<br>(1.16 - 1.30)       | 1.28<br>(1.20 - 1.36) | 0.90<br>(0.84 - 0.96) | 0.94<br>(0.88 - 1.00) | 1.22<br>(1.15 - 1.29) | 1.26<br>(1.19 - 1.34) | 2.31<br>(2.17 - 2.45)       | 2.57<br>(2.41 - 2.73) | 1.04<br>(0.98 - 1.10)          | 1.22<br>(1.14 - 1.30) |
| Aboriginal and Torres Strait Islander                |                             |                       |                       |                       |                       |                       |                             |                       |                                |                       |
| No (r)                                               |                             |                       |                       |                       |                       |                       |                             |                       |                                |                       |
| Yes                                                  |                             | 1.81<br>(1.68 - 1.95) |                       | 1.78<br>(1.66 - 1.92) |                       | 1.59<br>(1.48 - 1.71) |                             | 2.59<br>(2.42 - 2.78) |                                | 2.10<br>(1.95 - 2.27) |
| English second language                              |                             |                       |                       |                       |                       |                       |                             |                       |                                |                       |
| No (r)                                               |                             |                       |                       |                       |                       |                       |                             |                       |                                |                       |
| Yes                                                  |                             | 1.29<br>(1.23 - 1.36) |                       | 1.48<br>(1.41 - 1.55) |                       | 1.19<br>(1.13 - 1.25) |                             | 1.94<br>(1.84 - 2.04) |                                | 4.19<br>(4.01 - 4.37) |
| Socioeconomic advantage & disadvantage index (SEIFA) |                             | 0.92<br>(0.92 - 0.93) |                       | 0.93<br>(0.92 - 0.93) |                       | 0.93<br>(0.92 - 0.94) |                             | 0.88<br>(0.88 - 0.89) |                                | 0.92<br>(0.91 - 0.92) |

Table 4: Odd ratios (95% CI) for female children developmentally vulnerable on each domain by jurisdiction and sociodemographic characteristics (N=116023)

|                                                      | Developmentally vulnerable on each sub-domain |                       |                       |                       |                       |                       |                             |                       |                                |                       |
|------------------------------------------------------|-----------------------------------------------|-----------------------|-----------------------|-----------------------|-----------------------|-----------------------|-----------------------------|-----------------------|--------------------------------|-----------------------|
|                                                      | Physical health & wellbeing                   |                       | Social competence     |                       | Emotional maturity    |                       | Language & cognitive skills |                       | Communication & general skills |                       |
|                                                      | Model 1                                       | Model 2               | Model 1               | Model 2               | Model 1               | Model 2               | Model 1                     | Model 2               | Model 1                        | Model 2               |
| State                                                |                                               |                       |                       |                       |                       |                       |                             |                       |                                |                       |
| New South Wales (n)                                  |                                               |                       |                       |                       |                       |                       |                             |                       |                                |                       |
| Australian Capital Territory                         | 0.93<br>(0.77 - 1.13)                         | 1.42<br>(1.87 - 1.72) | 0.90<br>(0.73 - 1.10) | 1.32<br>(1.08 - 1.63) | 1.26<br>(1.01 - 1.57) | 1.82<br>(1.46 - 2.28) | 0.87<br>(0.69 - 1.09)       | 1.54<br>(1.22 - 1.95) | 0.85<br>(0.70 - 1.03)          | 1.36<br>(1.12 - 1.65) |
| Queensland                                           | 1.22<br>(1.14 - 1.30)                         | 1.16<br>(1.09 - 1.24) | 1.36<br>(1.28 - 1.45) | 1.35<br>(1.26 - 1.44) | 1.53<br>(1.41 - 1.65) | 1.47<br>(1.36 - 1.60) | 2.59<br>(2.43 - 2.76)       | 2.67<br>(2.50 - 2.86) | 1.01<br>(0.94 - 1.07)          | 1.23<br>(1.15 - 1.31) |
| South Australia                                      | 1.11<br>(1.01 - 1.23)                         | 0.99<br>(0.90 - 1.10) | 1.04<br>(0.94 - 1.16) | 0.96<br>(0.86 - 1.07) | 1.34<br>(1.18 - 1.51) | 1.21<br>(1.07 - 1.36) | 1.06<br>(0.94 - 1.20)       | 0.96<br>(0.85 - 1.09) | 0.78<br>(0.70 - 0.87)          | 0.80<br>(0.72 - 0.90) |
| Tasmania                                             | 1.15<br>(0.99 - 1.33)                         | 0.95<br>(0.81 - 1.10) | 0.84<br>(0.70 - 1.00) | 0.73<br>(0.61 - 0.88) | 0.90<br>(0.73 - 1.12) | 0.76<br>(0.61 - 0.94) | 1.16<br>(0.97 - 1.38)       | 1.02<br>(0.85 - 1.22) | 0.63<br>(0.53 - 0.76)          | 0.77<br>(0.64 - 0.93) |
| Victoria                                             | 0.84<br>(0.79 - 0.90)                         | 0.91<br>(0.85 - 0.97) | 0.90<br>(0.84 - 0.96) | 0.97<br>(0.90 - 1.03) | 1.10<br>(1.01 - 1.19) | 1.16<br>(1.07 - 1.26) | 1.01<br>(0.93 - 1.08)       | 1.14<br>(1.06 - 1.23) | 0.84<br>(0.79 - 0.89)          | 0.98<br>(0.92 - 1.04) |
| Western Australia                                    | 1.13<br>(1.04 - 1.22)                         | 1.16<br>(1.08 - 1.26) | 0.77<br>(0.70 - 0.84) | 0.80<br>(0.73 - 0.88) | 1.15<br>(1.04 - 1.28) | 1.19<br>(1.08 - 1.32) | 1.99<br>(1.84 - 2.16)       | 2.19<br>(2.02 - 2.38) | 0.83<br>(0.76 - 0.90)          | 0.98<br>(0.90 - 1.07) |
| Aboriginal and Torres Strait Islander                |                                               |                       |                       |                       |                       |                       |                             |                       |                                |                       |
| No (n)                                               |                                               |                       |                       |                       |                       |                       |                             |                       |                                |                       |
| Yes                                                  |                                               | 2.38<br>(2.19 - 2.58) |                       | 2.01<br>(1.83 - 2.20) |                       | 1.88<br>(1.69 - 2.10) |                             | 3.01<br>(2.78 - 3.25) |                                | 2.21<br>(2.02 - 2.42) |
| English second language                              |                                               |                       |                       |                       |                       |                       |                             |                       |                                |                       |
| No (n)                                               |                                               |                       |                       |                       |                       |                       |                             |                       |                                |                       |
| Yes                                                  |                                               | 1.24<br>(1.16 - 1.32) |                       | 1.56<br>(1.46 - 1.67) |                       | 1.23<br>(1.13 - 1.34) |                             | 2.13<br>(2.00 - 2.27) |                                | 5.16<br>(4.89 - 5.44) |
| Socioeconomic advantage & disadvantage index (SEIFA) |                                               | 0.90<br>(0.89 - 0.91) |                       | 0.91<br>(0.90 - 0.91) |                       | 0.91<br>(0.90 - 0.92) |                             | 0.87<br>(0.86 - 0.88) |                                | 0.90<br>(0.90 - 0.91) |

1  
2  
3  
4 Figure 2 shows the joint variation across Australian states and territories of child  
5  
6 vulnerability on one or more domain according to 1) adjusted predicted average levels of  
7  
8 vulnerability in the state or territory and 2) the slope index of inequality (absolute) based on SEIFA.  
9  
10 Ideally, jurisdictions should be in the bottom left-hand quadrant with lower overall levels of  
11  
12 vulnerability and lower absolute social inequality. The scales of the X-axes are the same to show  
13  
14 the lower overall vulnerability of females (median vulnerability about 15%) compared to males  
15  
16 (median vulnerability about 29%). Across all jurisdictions males experience higher inequality and  
17  
18 higher median levels of developmental vulnerability compared to females. For males and females,  
19  
20 the smallest levels of inequality and developmental vulnerability are found in New South Wales and  
21  
22 Tasmania whereas the largest inequalities and highest levels of developmental vulnerability are  
23  
24 found in Western Australia and Queensland. Children in Victoria and South Australia have higher  
25  
26 levels of inequality but lower vulnerability, while children in the Australian Capital Territory  
27  
28 experience lower levels of inequality yet higher vulnerability.  
29  
30  
31

32  
33 The *inequality difference* between states varies significantly with the lowest and highest  
34  
35 levels of inequality for males being 12.6 (lowest level of inequality in Tasmania and highest level in  
36  
37 South Australia) and for females is 8.2 (lowest level of inequality found in the Australian Capital  
38  
39 Territory and highest inequality in Western Australia). The difference in *overall developmental*  
40  
41 *vulnerability* for males between the top (New South Wales) and bottom (Queensland) states is 12.5  
42  
43 percentage points and for females it is 7.1 (top=Tasmania and bottom=Queensland). The  
44  
45 magnitude of these inequalities varies considerably between and within jurisdiction by sex. The  
46  
47 difference in inequality between males and females is smallest in Tasmania (difference 1.24), then  
48  
49 New South Wales (difference 2.03) followed by Victoria (difference 4.85), Queensland (difference  
50  
51 5.07), Western Australia (difference 5.83), and the Australian Capital Territory (difference 7.0) with  
52  
53 the highest level of inequality between males and females found in South Australia (difference  
54  
55 10.82).  
56  
57  
58  
59  
60

1  
2 Children residing in the most disadvantaged areas (SEIFA decile 1) in New South Wales  
3  
4 and Tasmania recorded the same proportion of children developmentally vulnerable (27%) as those  
5  
6 children residing in the middle of the SEIFA range (decile 5) in Western Australia and the  
7  
8 Australian Capital Territory and the lower end of the socioeconomic range (decile 8) in Queensland.  
9  
10 Those children living in the most advantaged areas in Queensland (decile 10) recorded a similar  
11  
12 proportion of children developmentally vulnerability as children residing in the poorer areas of  
13  
14 NSW, Tasmania, South Australia and Victoria (deciles 2-3).

15  
16  
17 Despite acknowledged universal availability of health services in Australia, there is a  
18  
19 marked variation in what the states and territories provide to families with young children. Table 5  
20  
21 shows the published schedules for maternal and child health services as well as preschool services  
22  
23 offered within the different jurisdictions. These two services represent the main universal systems  
24  
25 available to most Australian families. This table suggests that such services vary across the  
26  
27 jurisdictions. While any statistical analyses of association are not possible with such broad data, a  
28  
29 descriptive approach highlights the concordance with some of the results on the AEDI. Queensland,  
30  
31 where the services are not universal, has the lowest preschool attendance and one of the highest  
32  
33 children to staff ratios. New South Wales, Tasmania, and Victoria appear to have the most  
34  
35 comprehensive universal early years' service coverage – and in two out of these three states (NSW  
36  
37 and Tasmania) the level of inequality in child developmental vulnerability is the smallest.  
38  
39  
40  
41  
42  
43  
44  
45  
46  
47  
48  
49  
50  
51  
52  
53  
54  
55  
56  
57  
58  
59  
60

Table 5: Documented universal services offered in each of the Australian jurisdictions prior to school.

|                              | Child, Health and Parenting schedule of Universal services |                                   |                                            | Preschool attendance in 2008 | Preschool staff to child ratio |
|------------------------------|------------------------------------------------------------|-----------------------------------|--------------------------------------------|------------------------------|--------------------------------|
|                              | 1-3 months                                                 | 4-12 months                       | 1 – 5 years                                |                              |                                |
| New South Wales              | <2 weeks (HV)<br>1-4 weeks<br>6-8 weeks                    | 6-months<br>12 months             | 18-months<br>2 years<br>3 years<br>4 years | 60.4%                        | 1:10                           |
| Australian Capital Territory | 1-4 weeks (HV)<br>6-8 weeks                                | 6-9 months                        | 18 -21 months<br>3 – 3.5 years             | 88.3%                        | 1:11                           |
| Queensland                   | No universal service                                       |                                   |                                            | 26.6%                        | 1:12                           |
| South Australia              | < 2 weeks (HV)                                             | -                                 | -                                          | 87.9%                        | 1:10                           |
| Tasmania                     | 2 weeks (HV)<br>4 weeks<br>8 weeks                         | 4 months<br>8 months<br>12 months | 18 months<br>3 ½ years                     | 101.6%                       | 1:10                           |
| Victoria                     | < 2 weeks (HV)<br>2 weeks<br>4 weeks<br>8 weeks            | 4 months<br>8 months<br>12 months | 18 months<br>2 years<br>3 ½ years          | 95.8%                        | 1:15                           |
| Western Australia            | <10 days (HV)<br>6-8 weeks                                 | 3-4 months<br>8 months            | 18 months<br>3 years                       | 103.4%                       | 1:10                           |

HV = Home Visit. Note: States provide aggregated data for their preschool attendance rates and the Australian Bureau of Statistics provides data for the denominator, which is provided as the reason for percentages being over 100%. References for Table 5: [40-48].

## Discussion

Population-wide data has enabled Australia to be the first nation to quantify patterns of early child health and development across its different jurisdictional boundaries with their associated socioeconomic and demographic diversity. The work here provides the first national population benchmarks of some aspects of early childhood development as this pertains to readiness to learn at school. The data illuminate striking differences in early capacities that are strongly associated with socioeconomic and demographic circumstances.

Controlling for socioeconomic and demographic covariates reveals significant variations in developmental vulnerabilities across the states and territories. At the outset we acknowledge that there are socioeconomic and demographic determinants that are not fully captured by the models presented owing to their limited availability in the CURF. Nonetheless, it is both heartening and disturbing to discover such differences across jurisdictions. It is heartening because it highlights that child health and development may be improved by factors other than socioeconomic and demographic factors. However, it is disturbing to note that in a wealthy country where universal health coverage, mandated education and public health provision are available, and where there is still a reasonable social safety net, there are nevertheless striking disparities in levels of early child development. Why is it, for example, that after controlling for the standard socioeconomic and demographic factors, a child residing in Queensland relative to a child residing in New South Wales, has an increased odds of being developmentally vulnerable by the time they reach school entry (males OR 1.80, CI 1.74-1.87; females OR 1.52 CI 1.46-1.59)? There is little doubt that these differences would be reduced by more extensive socioeconomic and demographic controls but this is unlikely to explain all the residual differences within and across jurisdictions. This raises the question of whether differing policies, contexts and mix of services that support children and their families from birth to school age across the jurisdictions in Australia contribute to such inequalities? The marked variation demonstrated in Table 5 suggests this is a possibility.



1  
2  
3  
4  
5  
6  
7  
8  
9  
10  
11  
12  
13  
14  
15  
16  
17  
18  
19  
20  
21  
22  
23  
24  
25  
26  
27  
28  
29  
30  
31  
32  
33  
34  
35  
36  
37  
38  
39  
40  
41  
42  
43  
44  
45  
46  
47  
48  
49  
50  
51  
52  
53  
54  
55  
56  
57  
58  
59  
60

In South Australia (SA) the maternal and child health schedule moves quickly from a universal to an active targeted service; however all mothers not in the targeted service who wish to see a child health nurse can still visit the clinics. In SA almost all families have a Universal Contact Visit within the first two weeks after birth of their baby. Based on the nurse's assessment, mothers who have risk factors such as being young, socially isolated or having mental health issues are offered further intensive home visits. These visits are extensive with weekly sessions between week 3 and 8, followed by fortnightly visits up to 8 months, and then monthly visits until the child is two years old. The schedule includes a total of 34 visits in the first 2 years of the child's life [41]. In Tasmania, ACT and NSW a universal home visit is also conducted and then the state specific scheduled development checks for all families are offered. In Victoria, even though funded by the State government, the services are delivered by local governments adding a different context to the "shop front". NSW is the only state with an antenatal health check-up that identifies vulnerable families early. These families are then referred onto secondary services where necessary [49, 50]. In WA, a universal service is offered in the first 10 days after birth and then nurses aim to provide a total of six contacts [51]. In Queensland the government has no universal maternal and child health service and Queensland is also the state with the lowest preschool attendance [46, 48].

In addition to the variability across jurisdictions in the delivery of maternal and child health services and the level of access to these services there are also differences in the rate of investment in these services relative to population growth. For example in Western Australia service delivery has not kept pace with the population growth. The Western Australia Children's Commissioner in a submission to a Justice Standing Committee noted that although the birth rate had increased 16% over the previous years there had not been a concomitant increase in the number of child health nurses, school health nurses, Aboriginal health workers or investments in child health services. The Commissioner's figures revealed that despite the published Child and Maternal Health Schedule there was only one child health nurse for every 167 births (whereas most other jurisdictions had ratios between 1:78 – 1:98) [47].

1  
2 While it may be tempting to make strong claims about the co-variation in AEDI results with  
3  
4 models and levels of human service delivery in the various Australian jurisdictions, a much more  
5  
6 extensive investigation is required to move toward any causal interpretation. For example,  
7  
8 controlling for the covariates increases the odds of developmental vulnerability for children living  
9  
10 within the Australian Capital Territory. Just why this should be so, given the shallower  
11  
12 socioeconomic gradient in this jurisdiction (with no children recorded in the poorest 5 deciles of  
13  
14 SEIFA), is unclear. Why then, despite the ACT being a relatively wealthy state with lower  
15  
16 socioeconomic inequality, do we see increased odds for vulnerability across all five of the  
17  
18 developmental domains?  
19  
20

21  
22 Gender differences are evident in these data. There are well documented gender differences  
23  
24 in brain development of young children [52, 53]. At early ages in particular, boys develop at a  
25  
26 slower rate than girls [54], and there is evidence that different areas of the brain develop in a  
27  
28 different sequence in girls compared with most boys [55]. This is consistently evident within the  
29  
30 EDI [29] and AEDI results [18]. However within gender there are significant differences for boys  
31  
32 and girls residing in different jurisdictions, and socioeconomic and demographic contexts. What  
33  
34 are the contextual factors in South Australia that lead to both the greatest inequality difference  
35  
36 between males and females and also the greatest degree of inequality within the male gender  
37  
38 compared to other jurisdictions? This is in contrast to a smaller gap between boys and girls living  
39  
40 in Tasmania and New South Wales, and both of these jurisdictions show the lowest level of  
41  
42 inequality while still also maintaining lower levels of developmental vulnerability overall.  
43  
44

45  
46 Worth noting is also the finding that inequality in vulnerability is higher for girls than boys,  
47  
48 even though boys on average have poorer outcomes. This seems to be supported by evidence  
49  
50 suggesting that girls are more susceptible to adverse external conditions than boys. Persistent  
51  
52 poverty had a significantly larger effect on the cognitive scores of pre-school aged girls than boys  
53  
54 [56]. In this study, income was more strongly associated with cognitive development for girls, who,  
55  
56 when annual income increased by \$10,000, experienced a larger improvement in cognitive scores  
57  
58  
59  
60

1  
2 than boys. Additionally, girls' scores were worse than boys' when compared to controls in higher  
3  
4 socioeconomic status, which is similar to our results.

5  
6 Across all five of the AEDI domains both Aboriginal and ESL children have increased odds  
7  
8 of vulnerability compared to non-Aboriginal and non-ESL children respectively. Of interest is that  
9  
10 the inequality between Aboriginal and non-Aboriginal children is greater for females than for males  
11  
12 particularly on the Physical health and wellbeing domain, where the odds ratio for male Aboriginal  
13  
14 children is 1.81 (CI 1.68-1.95) compared with 2.38 for female Aboriginal children (CI 2.19-2.58).  
15  
16 However the greatest inequality gap between Aboriginal and non-Aboriginal children is found on  
17  
18 the language and cognitive development domain irrespective of gender (OR 2.59 males; 95% CI,  
19  
20 2.42-2.78 and OR females 3.01; 95% CI, 2.78-3.25). Interestingly, although SEIFA has a large  
21  
22 impact on each of the five AEDI domains, it is the Language and cognitive domain that is  
23  
24 influenced the greatest by the socio-economic index.  
25  
26  
27

28  
29 For children with ESL status the highest ORs for vulnerability were found for the  
30  
31 Communication skills and general knowledge domain with an OR of 4.19 for males (CI 4.01-4.37)  
32  
33 and an OR of 5.16 for females (CI 4.89-5.44). The results needs to be considered in light of the  
34  
35 fact that the AEDI measures school based communication skills in English as English is the main  
36  
37 language of instruction in Australian schools. Results reported elsewhere have shown that children  
38  
39 who speak another language but are additionally proficient in English show the lowest levels of  
40  
41 developmental vulnerabilities across each of the five domains, however those that are not proficient  
42  
43 in English (independent of ESL status) show poorer results on the AEDI [18, 57, 58].  
44  
45

46  
47 The AEDI will be repeated once every three years (i.e. 2012, 2015, 2018...). This will  
48  
49 enable onward monitoring and surveillance and creates opportunities to examine the effects of  
50  
51 policies and interventions. This will require political will and leadership as well as the capitalisation  
52  
53 of this opportunity by the scientific community and those interested in human service evaluation.  
54  
55 The onward implementation of the AEDI also encourages efforts in establishing a longitudinal  
56  
57 capacity (i.e. following the same child/person over time) to illuminate the pathways leading to a  
58  
59  
60

1  
2 variety of human development outcomes. Among such life course outcomes are those pertaining to  
3  
4 health/ill-health as well as wider outcomes pertaining to social, economic and civic participation.  
5

6 In Australia there are robust administrative data linkage methodologies, some longstanding  
7  
8 and well established, that are currently being assessed for their potential to use AEDI data to  
9  
10 prospectively estimate the human development benefits of early childhood opportunities,  
11  
12 environments and services on later life course outcomes. It is possible to construct crosswalks  
13  
14 between health, early child development and education databases that integrate population-wide,  
15  
16 person-specific data at national, provincial, and community levels [59]. As such it is possible to  
17  
18 create a historical perspective of developmental trajectories for an entire population of children.  
19  
20

21 Australia is now progressing towards national data linkage with jurisdiction based “nodes”  
22  
23 working together under a national network (the Population Health Research Network) that will  
24  
25 allow researchers to access linked data that is de-identified. The systems will improve Australia’s  
26  
27 ability to monitor health and health inequalities using data already collected by social services  
28  
29 including primarily health but also education and family and community services. In Western  
30  
31 Australia and New South Wales data linkage systems have been operating for over 10 years [60],  
32  
33 however the national network with significant infrastructure investment from the federal and state  
34  
35 governments aims to provide the world’s most comprehensive population health database to  
36  
37 monitor and study health across the country [61]. The 2009 AEDI dataset is currently being linked  
38  
39 into this national network of jurisdictional based nodes.  
40  
41  
42

43 Currently there are a number of interventions aimed at improving child development that  
44  
45 show demonstrated efficacy [15]. However, there is still insufficient data to inform policies and  
46  
47 practices to reduce inequalities in early child development. With linked population data sets  
48  
49 program/policy evaluation and economic models can also be investigated (such as the effectiveness  
50  
51 of preventive interventions which are traditionally hard to quantify). Such systems will be  
52  
53 invaluable tools for assessing the efficacy and effectiveness of policies and interventions that aim to  
54  
55 reduce inequalities in health and development across populations [3].  
56  
57  
58  
59  
60

1  
2  
3  
4  
5  
6  
7  
8  
9  
10  
11  
12  
13  
14  
15  
16  
17  
18  
19  
20  
21  
22  
23  
24  
25  
26  
27  
28  
29  
30  
31  
32  
33  
34  
35  
36  
37  
38  
39  
40  
41  
42  
43  
44  
45  
46  
47  
48  
49  
50  
51  
52  
53  
54  
55  
56  
57  
58  
59  
60

The Early Development Instrument (EDI) is gaining attention internationally with the instrument now being utilized in over a dozen countries [34]. Part of the attraction is that the EDI is administered just like a census and is a holistic measure of child health and development. Regular monitoring of inequalities and use of these data for education, advocacy, and increased accountability among the general public and decision makers is urgently needed, but alone will not be sufficient [62]. Equity of opportunity and access must be a priority in the design of policies and interventions. The AEDI provides a critical measure in a developmental stage that is otherwise surprisingly uncharted in the life course trajectory given the contemporary claims placed on the importance of optimising development at early points in life.

**Acknowledgements:**

The 2009 AEDI data collection was conducted by the Centre for Community Child Health (at The Royal Children's Hospital Melbourne, and a key research centre at the Murdoch Childrens Research Institute) in partnership with the Telethon Institute for Child Health Research in Perth. The AEDI is funded by the Australian Government's Department of Education, Employment and Workplace Relations (DEEWR) who have also made the AEDI Confidentialised Unit Record File available to authors SB, JL, VC, SZ, SS, AG, MJ and SG.

**Competing Interest:** None to declare.

**Funding Statement:** SB, SG and TG's salaries are part supported by the Department of Education, Employment and Workplace Relations (DEEWR) to support the AEDI. JL is supported by a National Health and Medical Research Council, Australia Fellowship Award that supports AR and MM.

**Licence for Publication:** The Corresponding Author has the right to grant on behalf of all authors and does grant on behalf of all authors, an exclusive licence (or non-exclusive for government employees) on a worldwide basis to the BMJ Publishing Group Ltd and its Licensees to permit this article (if accepted) to be published in JECH editions and any other BMJPGJL products to exploit all subsidiary rights, as set out in our licence (<http://group.bmj.com/products/journals/instructions-for-authors/licence-forms/>)."

**Disclaimer:** The findings and views reported in this paper are those of the authors and should not be attributed to DEEWR, the Centre for Community Child Health or the Telethon Institute for Child Health Research.

1  
2  
3  
4  
5  
6  
7  
8  
9  
10  
11  
12  
13  
14  
15  
16  
17  
18  
19  
20  
21  
22  
23  
24  
25  
26  
27  
28  
29  
30  
31  
32  
33  
34  
35  
36  
37  
38  
39  
40  
41  
42  
43  
44  
45  
46  
47  
48  
49  
50  
51  
52  
53  
54  
55  
56  
57  
58  
59  
60

**Contributor Authorship Statement:** SB, JL, SS, VC and SZ conceived the original idea and structure of the paper. SB led and wrote the majority of the paper. AG and AR wrote the first draft of the methods and results section, with AR and MM undertaking responsibility for the analyses under direction by JL and SB. TG compiled the universal policy analyses. SG directed the 2009 AEDI data collection in conjunction with SB, SS and SZ. MJ is the original developer of the EDI on which the AEDI is based and was involved in the adaptation process, and both MJ and CH provide continuing advocacy and support for the population utility of the EDI and AEDI. All authors provided input to the paper.

## References

- 1 Lynch JW, Davey-Smith G. A Life Course Approach to Chronic Disease Epidemiology. *Annu Rev Public Health* 2005;**26**:1-35.
- 2 Marmot M. Fair Society, Healthy Lives: The Marmot Review: The Marmot Review; 2010. Available from: <http://www.marmotreview.org/AssetLibrary/pdfs/Reports/FairSocietyHealthyLives.pdf>.
- 3 Lynch JW, Law C., Brinkman S., et al. Inequalities in child healthy development: Some challenges for effective implementation. *Soc Sci Med* 2010;**71**:1219-374.
- 4 Hertzman C, Boyce T. How Experience Gets Under the Skin to Create Gradients in Developmental Health. *Annu Rev Public Health* 2010;**31**:329-47.
- 5 Heckman J. Schools, Skills, and Synapses. *Econ Inq* 2008;**46**:289-324.
- 6 UNICEF. The State of The Worlds Children: Downloadable Statistical Tables. UNICEF; 2010 [updated 11/8/2010]; Available from: <http://www.unicef.org/rightsite/sowc/statistics.php>.
- 7 OECD. OECD Programme for International Student Assessment (PISA). 2012; Available from: [www.pisa.oecd.org](http://www.pisa.oecd.org).
- 8 United Nations Development Programme. The Millennium Development Goals: Progress Reversals and Challenges. New York 2002.
- 9 UNESCO. Strong Foundations Early Childhood Care and Education. 2007; Available from: <http://unesdoc.unesco.org/images/0014/001477/147785E.pdf>.
- 10 Young ME. Early Child Development: From Measurement to Action. Washington DC., USA: The World Bank; 2007.
- 11 Status of the Convention on the Rights of the Child. Report of the Secretary-General: United Nations General Assembly, United Nations, Sixty-fifth session Sess. (2 August 2010, 2010).
- 12 Janus M, Duku E. The school entry gap: Socioeconomic, family, and health factors associated with children's school readiness to learn. *Early Education & Development* 2007;**18**:375-403.
- 13 Meisels SJ. Developmental Screening in Early Childhood: The Interaction of Research and Social Policy. *Annu Rev Public Health* 1988;**9**:527-50.
- 14 Meisels SJ. Can Developmental Screening Tests Identify Children Who Are Developmentally at Risk? *Pediatrics* 1989;**83**:578-85.
- 15 Barnett WS. Effectiveness of Early Educational Intervention. *Science* 2011 Aug;**333**:975-8.
- 16 Goldfeld S, Sayers M, Brinkman S, et al. The process and policy challenges of adapting and implementing the Early Development Instrument in Australia. *Early Education and Development* 2009;**20**:978-91.
- 17 Janus M, Brinkman S, Duku E, et al. The Early Development Instrument: A population-based measure for communities. A handbook on development, properties and use. Hamilton, Ontario: Offord Centre for Child Studies; 2007.
- 18 Centre for Community Child Health and Telethon Institute for Child Health Research. A Snapshot of Early Childhood Development in Australia. Australian Early Development Index (AEDI) National Report 2009. Canberra: Australian Government 2009.
- 19 Hertzman C, Williams R. Making Early Childhood Count. *Can Med Assoc J* 2009;**180**:68-71.
- 20 OECD. OECD.StatExtracts. Health Expenditure and Financing: OECD; 2008.
- 21 Australian Bureau of Statistics. 3101.0 - Australian Demographic Statistics. June 2011. Canberra: Australian Bureau of Statistics; 2011.
- 22 Steering Committee for the Review of Government Service Provision. Overcoming Indigenous Disadvantage: Key Indicators 2011.2011: Available from: [http://www.pc.gov.au/\\_data/assets/pdf\\_file/0018/111609/key-indicators-2011-report.pdf](http://www.pc.gov.au/_data/assets/pdf_file/0018/111609/key-indicators-2011-report.pdf).



- 1  
2  
3  
4  
5  
6  
7  
8  
9  
10  
11  
12  
13  
14  
15  
16  
17  
18  
19  
20  
21  
22  
23  
24  
25  
26  
27  
28  
29  
30  
31  
32  
33  
34  
35  
36  
37  
38  
39  
40  
41  
42  
43  
44  
45  
46  
47  
48  
49  
50  
51  
52  
53  
54  
55  
56  
57  
58  
59  
60
- 23 Australian Bureau of Statistics. 1301.0 - Year Book Australia, 2009-10. Canberra: Australian Bureau of Statistics; 2010.
- 24 Atkinson AB, Piketty P, Saez E. Top Incomes in the Long Run History. *J Econ Lit* 2011;**49**:3-71.
- 25 United Nations Development Programme. Human Development Report 2011. New York: Palgrave Macmillan; 2011. Available from: [http://hdr.undp.org/en/media/HDR\\_2011\\_EN\\_Complete.pdf](http://hdr.undp.org/en/media/HDR_2011_EN_Complete.pdf).
- 26 Silburn S, Zubrick S.R., De Maio JA, et al. The Western Australian Aboriginal Child Health Survey: Strengthening the Capacity of Aboriginal Children, Families and Communities. Perth: Curtin University of Technology and the Telethon Institute for Child Health Research.2006.
- 27 Centre for Community Child Health. AEDI Research CURF. Australian Government; 2011.
- 28 Centre for Community Child Health. Australian Early Development Index: Data Users Guide. Australian Government; 2010.
- 29 Janus M, Offord D. Development and psychometric properties of the Early Development Instrument (EDI): A measure of children's school readiness. *Canadian Journal of Behavioural Science* 2007;**39**:1-22.
- 30 Brinkman S, Gregory T, Harris J, et al. Associations between the early development instrument at age 5 and reading and numeracy skills at ages 8, 10 and 12: a prospective linked data study. *Aust N Z J Public Health* 2012;**in press**.
- 31 Brinkman S, Silburn S, Lawrence D, et al. Investigating the validity of the Australian Early Development Index. *Early Education and Development* 2007;**18**:427-51.
- 32 Brinkman S, Zubrick S, Silburn S. Predictive Validity of a school readiness assessment on later cognitive and behavioral outcomes. *Journal of Early Education and Development* 2012;**in press**.
- 33 Forget-Dubois N, Lemelin, J.P. Boivin, M., Dionne, G. Predicting early school achievement with the EDI: A longitudinal population-based study. *Early Education and Development* 2007;**18**:405-26.
- 34 Janus M, Brinkman SA, Duku E. Validity and psychometric properties of the Early Development Instrument in Canada, Australia, United States and Jamaica. *Soc Ind Res* 2011;**103**:283-97.
- 35 Centre for Community Child Health and Telethon Institute for Child Health Research. AEDI Guide for Teachers. Canberra: Centre for Community Child Health and Telethon Institute for Child Health Research2009.
- 36 Australian Bureau of Statistics. Information Paper: An Introduction to Socio-Economic Indexes for Areas (SEIFA). Australian Government,; 2008.
- 37 Centre for Community Child Health and Telethon Institute for Child Health Research. AEDI Technical Paper No 1: Children developmentally vulnerable on one or more and two or more, AEDI domains. Australian Government; 2011.
- 38 Wagstaff A, Paci P, van Doorslaer E. On the measurement of inequalities in health. *Social Science & Medicine* 1991;**33**:545-57.
- 39 Harper S, Lynch JW. Methods for Measuring Cancer Disparities: Using Data Relevant to Healthy People 2010 Cancer-Related Objectives. Bethesda: National Cancer Institute2005.
- 40 ACT Health. Australian Capital Territory Immunisation Strategy (2007-2010) 2007. Available from: <http://www.health.act.gov.au/policies-and-plans/find-policy-documents/>.
- 41 Children Youth and Women's Health Service. Family Home Visiting: Service Outline 2005. Available from: <http://www.cyh.com/SubContent.aspx?p=134>.
- 42 Department of Education and Early Childhood Development. Your Maternal and Child Health Service Visits. 2011; Available from: <http://www.education.vic.gov.au/earlychildhood/mch/visits.htm>.
- 43 Department of Health and Human Services. Child Health Centres. 2011; Available from: [http://www.dhhs.tas.gov.au/service\\_information/services\\_files/child\\_health\\_centres](http://www.dhhs.tas.gov.au/service_information/services_files/child_health_centres).

- 1  
2  
3  
4  
5  
6  
7  
8  
9  
10  
11  
12  
13  
14  
15  
16  
17  
18  
19  
20  
21  
22  
23  
24  
25  
26  
27  
28  
29  
30  
31  
32  
33  
34  
35  
36  
37  
38  
39  
40  
41  
42  
43  
44  
45  
46  
47  
48  
49  
50  
51  
52  
53  
54  
55  
56  
57  
58  
59  
60
- 44 NSW Department of Health. Personal Health Record (The Blue Book). 2011; Available from: [http://www.health.nsw.gov.au/policies/ib/2007/IB2007\\_008.html](http://www.health.nsw.gov.au/policies/ib/2007/IB2007_008.html).
- 45 Office of Early Childhood Education and Care. Child and Family Support Hubs. 2011; Available from: <http://deta.qld.gov.au/earlychildhood/families/ey-services/support-hubs.html>.
- 46 Dowling A, O'Malley K. Preschool Education in Australia. Melbourne: Australian Council for Educational Research,2009.
- 47 Commissioner for Children and Young People. Submission to the Community Development and Justice Standing Committee; Inquiry into the Adequacy of Services to Meet the Developmental Needs of Western Australia's Children. Perth2009.
- 48 Hirst C. Re-Birthing. Report of the Review of Maternity Services in Queensland. Brisbane: Department of Health, Queensland2005.
- 49 Families NSW. Safe Start. 2011; Available from: [http://www.families.nsw.gov.au/getting\\_help\\_and\\_support/safe\\_start.html](http://www.families.nsw.gov.au/getting_help_and_support/safe_start.html).
- 50 Families NSW. Health home visiting & early childhood health services. 2011; Available from: [http://www.families.nsw.gov.au/getting\\_help\\_and\\_support/health\\_home\\_visiting.html](http://www.families.nsw.gov.au/getting_help_and_support/health_home_visiting.html).
- 51 Commissioner for Children and Young People. Submission to the Education and Health Standing Committee: Review of WA's Current and Future Hospital and Community Health Care Services. Perth: Government of Western Australia.; 2009.
- 52 Anokhin AP, Lutzenberger W, Nikolaev A, et al. Complexity of electrocortical dynamics in children: developmental aspects. *Dev Psychobiol* 2000;**36**:9-22.
- 53 Hanlon H, Thatcher R, Cline M. Gender differences in the development of EEG coherence in normal children. . *Dev Neuropsychol* 1999;**16**:479-506.
- 54 Bornstein M, Hahn C, Haynes O. Specific and general language performance across early childhood: Stability and gender considerations. *First Language* 2004;**24**:267-304.
- 55 Weinberg MK, Tronick EZ, Cohn JF, et al. Gender differences in emotional expressivity and self-regulation during early infancy. *Dev Psychol* 1999;**35**:175-88.
- 56 Petterson SM, Albers AB. Effects of poverty and maternal depression on early child development. *Child Dev* 2001;**72**:1794-813.
- 57 Brinkman S, Sayers M, Goldfeld S, et al. Population monitoring of language and cognitive development in Australia: The Australian Early Development Index. *International Journal of Speech-Language Pathology* 2009;**11**:1-12.
- 58 Janus M, Hertzman C, Guhn M, et al. Reply to Li, D'Angiulli and Kendall: The Early Development Index and children from culturally and linguistically diverse backgrounds. *Early Years: An International Journal of Research and Development* 2009;**29**:31-5.
- 59 Jutte DP, Roos, L.L., Brownell, M.D. Administrative Record Linkage as a Tool for Public Health Research. *Annu Rev Public Health* 2011;**32**:91-108.
- 60 Holman C, Bass A, Rosman D, et al. A decade of data linkage in Western Australia: strategic design, applications and benefits of the WA data linkage system. *Aust Health Rev* 2008;**32**:766 - 77.
- 61 PHRN. Population Health Research Network. Perth: Population Health Research Network; 2011; Available from: [www.phrn.org.au](http://www.phrn.org.au).
- 62 Victora CG, Wagstaff A, Schellenberg JA, et al. Applying an equity lens to child health and mortality: more of the same is not enough. *Lancet* 2003;**362**:233-41.

Figure 1: Flow chart of participants

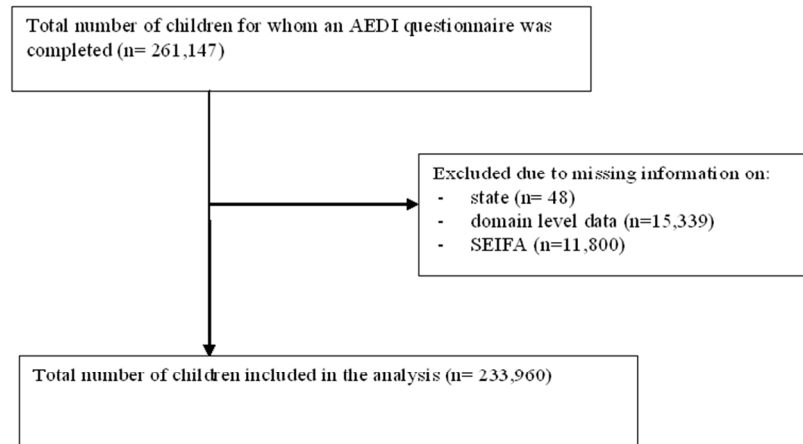

248x173mm (96 x 96 DPI)

1  
2  
3  
4  
5  
6  
7  
8  
9  
10  
11  
12  
13  
14  
15  
16  
17  
18  
19  
20  
21  
22  
23  
24  
25  
26  
27  
28  
29  
30  
31  
32  
33  
34  
35  
36  
37  
38  
39  
40  
41  
42  
43  
44  
45  
46  
47  
48  
49  
50  
51  
52  
53  
54  
55  
56  
57  
58  
59  
60

Figure 2: Adjusted prevalence of vulnerability (%) on one or more AEDI domains and absolute socioeconomic inequality (%) by jurisdiction.

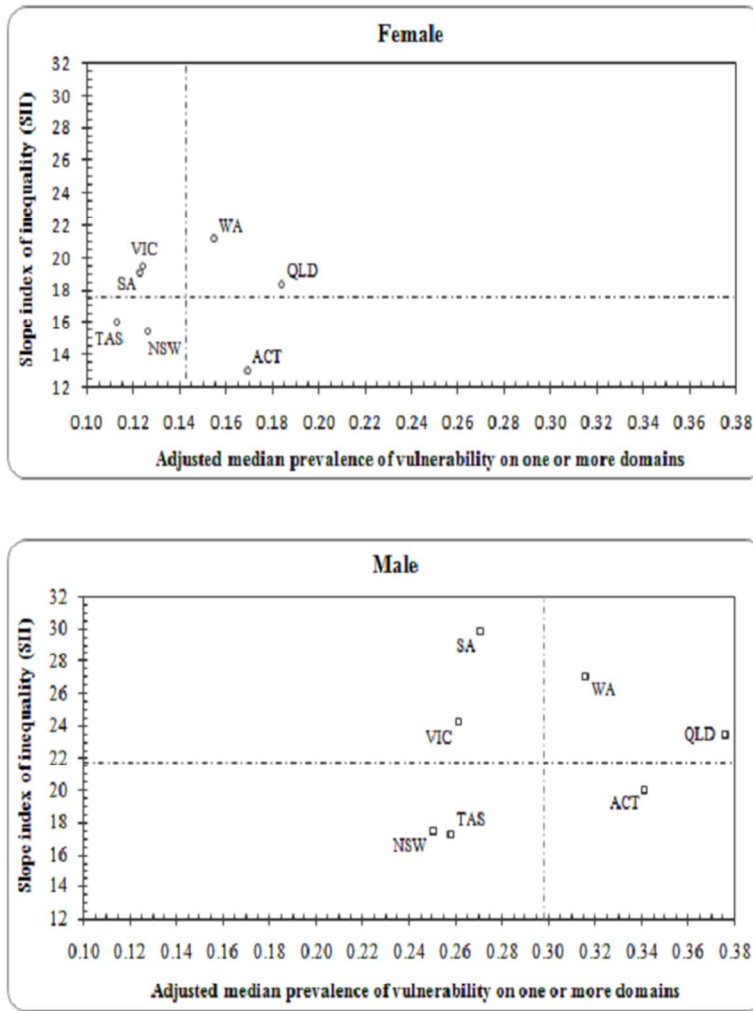

\*Dotted lines indicate national median vulnerability (%) and absolute socioeconomic inequality (%).

194x256mm (96 x 96 DPI)

STROBE 2007 (v4) Statement—Checklist of items that should be included in reports of *cross-sectional studies*

| Section/Topic                | Item # | Recommendation                                                                                                                                                                                               | Reported on page # |
|------------------------------|--------|--------------------------------------------------------------------------------------------------------------------------------------------------------------------------------------------------------------|--------------------|
| Title and abstract           | 1      | (a) Indicate the study's design with a commonly used term in the title or the abstract<br><i>Completed - Census of child development</i>                                                                     | 1 & 4              |
|                              |        | (b) Provide in the abstract an informative and balanced summary of what was done and what was found<br><i>Completed</i>                                                                                      | 4                  |
| <b>Introduction</b>          |        |                                                                                                                                                                                                              |                    |
| Background/rationale         | 2      | Explain the scientific background and rationale for the investigation being reported<br><i>Completed</i>                                                                                                     | 5-9                |
| Objectives                   | 3      | State specific objectives, including any prespecified hypotheses<br><i>Objectives stated</i>                                                                                                                 | 9                  |
| <b>Methods</b>               |        |                                                                                                                                                                                                              |                    |
| Study design                 | 4      | Present key elements of study design early in the paper<br><i>Census of child development</i>                                                                                                                |                    |
| Setting                      | 5      | Describe the setting, locations, and relevant dates, including periods of recruitment, exposure, follow-up, and data collection<br><i>Completed</i>                                                          | 9-10               |
| Participants                 | 6      | (a) Give the eligibility criteria, and the sources and methods of selection of participants<br><i>Completed</i>                                                                                              | 9-10               |
| Variables                    | 7      | Clearly define all outcomes, exposures, predictors, potential confounders, and effect modifiers. Give diagnostic criteria, if applicable<br><i>Completed</i>                                                 | 12-13              |
| Data sources/<br>measurement | 8*     | For each variable of interest, give sources of data and details of methods of assessment (measurement). Describe comparability of assessment methods if there is more than one group<br><i>Completed</i>     | 12-13              |
| Bias                         | 9      | Describe any efforts to address potential sources of bias<br><i>No attempt has been made to address any potential source of bias – the census collected an estimated 97.5% of the 5 year old population.</i> | n/a                |

1  
2  
3  
4  
5  
6  
7  
8  
9  
10  
11  
12  
13  
14  
15  
16  
17  
18  
19  
20  
21  
22  
23  
24  
25  
26  
27  
28  
29  
30  
31  
32  
33  
34  
35  
36  
37  
38  
39  
40  
41  
42  
43  
44  
45  
46  
47  
48  
49

| Section/Topic          | Item # | Recommendation                                                                                                                                                                                    | Reported on page # |
|------------------------|--------|---------------------------------------------------------------------------------------------------------------------------------------------------------------------------------------------------|--------------------|
| Study size             | 10     | Explain how the study size was arrived at<br><i>Not applicable - census</i>                                                                                                                       | n/a                |
| Quantitative variables | 11     | Explain how quantitative variables were handled in the analyses. If applicable, describe which groupings were chosen and why<br><i>Completed</i>                                                  | 13                 |
| Statistical methods    | 12     | (a) Describe all statistical methods, including those used to control for confounding<br><i>Completed</i>                                                                                         | 13-15              |
|                        |        | (b) Describe any methods used to examine subgroups and interactions<br><i>Completed</i>                                                                                                           | 13-15              |
|                        |        | (c) Explain how missing data were addressed<br><i>Completed</i>                                                                                                                                   | 13                 |
|                        |        | (d) If applicable, describe analytical methods taking account of sampling strategy<br><i>Not applicable - census</i>                                                                              | n/a                |
|                        |        | (e) Describe any sensitivity analyses<br><i>None</i>                                                                                                                                              | -                  |
| <b>Results</b>         |        |                                                                                                                                                                                                   |                    |
| Participants           | 13*    | (a) Report numbers of individuals at each stage of study—eg numbers potentially eligible, examined for eligibility, confirmed eligible, included in the study, completing follow-up, and analysed | 10-11              |
|                        |        | (b) Give reasons for non-participation at each stage                                                                                                                                              |                    |
|                        |        | (c) Consider use of a flow diagram<br><i>Flow diagram presented</i>                                                                                                                               | Figure file        |
| Descriptive data       | 14*    | (a) Give characteristics of study participants (eg demographic, clinical, social) and information on exposures and potential confounders<br><i>Completed</i>                                      | 10                 |
|                        |        | (b) Indicate number of participants with missing data for each variable of interest<br><i>Completed</i>                                                                                           |                    |
| Outcome data           | 15*    | Report numbers of outcome events or summary measures<br><i>Completed</i>                                                                                                                          |                    |

| Section/Topic            | Item # | Recommendation                                                                                                                                                                                                                   | Reported on page # |
|--------------------------|--------|----------------------------------------------------------------------------------------------------------------------------------------------------------------------------------------------------------------------------------|--------------------|
| Main results             | 16     | (a) Give unadjusted estimates and, if applicable, confounder-adjusted estimates and their precision (eg, 95% confidence interval). Make clear which confounders were adjusted for and why they were included<br><b>Completed</b> | 16, 18 & 19        |
|                          |        | (b) Report category boundaries when continuous variables were categorized<br><b>Completed</b>                                                                                                                                    |                    |
|                          |        | (c) If relevant, consider translating estimates of relative risk into absolute risk for a meaningful time period<br><b>Not applicable</b>                                                                                        | n/a                |
| Other analyses           | 17     | Report other analyses done—eg analyses of subgroups and interactions, and sensitivity analyses<br><b>Completed</b>                                                                                                               | 20-21              |
| <b>Discussion</b>        |        |                                                                                                                                                                                                                                  |                    |
| Key results              | 18     | Summarise key results with reference to study objectives<br><b>Completed</b>                                                                                                                                                     | 23                 |
| Limitations              | 19     | Discuss limitations of the study, taking into account sources of potential bias or imprecision. Discuss both direction and magnitude of any potential bias<br><b>Completed</b>                                                   |                    |
| Interpretation           | 20     | Give a cautious overall interpretation of results considering objectives, limitations, multiplicity of analyses, results from similar studies, and other relevant evidence<br><b>Completed</b>                                   |                    |
| Generalisability         | 21     | Discuss the generalisability (external validity) of the study results<br><b>Completed</b>                                                                                                                                        |                    |
| <b>Other information</b> |        |                                                                                                                                                                                                                                  |                    |
| Funding                  | 22     | Give the source of funding and the role of the funders for the present study and, if applicable, for the original study on which the present article is based<br><b>Completed</b>                                                | 29                 |

\*Give information separately for cases and controls in case-control studies and, if applicable, for exposed and unexposed groups in cohort and cross-sectional studies.

**Note:** An Explanation and Elaboration article discusses each checklist item and gives methodological background and published examples of transparent reporting. The STROBE checklist is best used in conjunction with this article (freely available on the Web sites of PLoS Medicine at <http://www.plosmedicine.org/>, Annals of Internal Medicine at <http://www.annals.org/>, and Epidemiology at <http://www.epidem.com/>). Information on the STROBE Initiative is available at [www.strobe-statement.org](http://www.strobe-statement.org).



**Jurisdictional, socioeconomic and gender inequalities in  
child health and development: Analysis of a national census  
of 5 year olds in Australia.**

|                                 |                                                                                                                                                                                                                                                                                                                                                                                                                                                                                                                                                                                                                                                                                                                                                                                                                                                                                                                                                                                                                                                                                                                                                                                                                                                                                                                                               |
|---------------------------------|-----------------------------------------------------------------------------------------------------------------------------------------------------------------------------------------------------------------------------------------------------------------------------------------------------------------------------------------------------------------------------------------------------------------------------------------------------------------------------------------------------------------------------------------------------------------------------------------------------------------------------------------------------------------------------------------------------------------------------------------------------------------------------------------------------------------------------------------------------------------------------------------------------------------------------------------------------------------------------------------------------------------------------------------------------------------------------------------------------------------------------------------------------------------------------------------------------------------------------------------------------------------------------------------------------------------------------------------------|
| Journal:                        | <i>BMJ Open</i>                                                                                                                                                                                                                                                                                                                                                                                                                                                                                                                                                                                                                                                                                                                                                                                                                                                                                                                                                                                                                                                                                                                                                                                                                                                                                                                               |
| Manuscript ID:                  | bmjopen-2012-001075.R1                                                                                                                                                                                                                                                                                                                                                                                                                                                                                                                                                                                                                                                                                                                                                                                                                                                                                                                                                                                                                                                                                                                                                                                                                                                                                                                        |
| Article Type:                   | Research                                                                                                                                                                                                                                                                                                                                                                                                                                                                                                                                                                                                                                                                                                                                                                                                                                                                                                                                                                                                                                                                                                                                                                                                                                                                                                                                      |
| Date Submitted by the Author:   | 22-Jul-2012                                                                                                                                                                                                                                                                                                                                                                                                                                                                                                                                                                                                                                                                                                                                                                                                                                                                                                                                                                                                                                                                                                                                                                                                                                                                                                                                   |
| Complete List of Authors:       | Brinkman, Sally; The University of Western Australia, Telethon Institute for Child Health Research, Centre for Child Health Research<br>Gialamas, Angela; The University of Adelaide, School of Population Health, Discipline of Public Health<br>Rahman, Azizur; The University of Adelaide, School of Population Health, Discipline of Public Health<br>Mittinty, Murthy; The University of Adelaide, School of Population Health, Discipline of Public Health<br>Gregory, Tess; The University of Western Australia, Telethon Institute for Child Health Research, Centre for Child Health Research<br>Silburn, Sven; Menzies School of Health Sciences,<br>Goldfeld, Sharon; The University of Melbourne, Murdoch Children's Research Institute; Royal Childrens Hospital, Centre for Community Child Health<br>Zubrick, Stephen; The University of Western Australia, Telethon Institute for Child Health Research, Centre for Child Health Research<br>Carr, Vaughan; The University of New South Wales, School of Psychiatry, Faculty of Medicine; Schizophrenia Research Institute,<br>Janus, Magdalena; McMaster University, Offord Centre for Child Studies<br>Hertzman, Clyde; University of British Columbia, Human Early Learning Partnership<br>Lynch, John; The University of Bristol, School of Social and Community Medicine |
| <b>Primary Subject Heading</b>: | Public health                                                                                                                                                                                                                                                                                                                                                                                                                                                                                                                                                                                                                                                                                                                                                                                                                                                                                                                                                                                                                                                                                                                                                                                                                                                                                                                                 |
| Secondary Subject Heading:      | Epidemiology, Health policy, Paediatrics                                                                                                                                                                                                                                                                                                                                                                                                                                                                                                                                                                                                                                                                                                                                                                                                                                                                                                                                                                                                                                                                                                                                                                                                                                                                                                      |
| Keywords:                       | Social Epidemiology, Inequality, Public Health Policy, Child Health and Development, Australia                                                                                                                                                                                                                                                                                                                                                                                                                                                                                                                                                                                                                                                                                                                                                                                                                                                                                                                                                                                                                                                                                                                                                                                                                                                |
|                                 |                                                                                                                                                                                                                                                                                                                                                                                                                                                                                                                                                                                                                                                                                                                                                                                                                                                                                                                                                                                                                                                                                                                                                                                                                                                                                                                                               |



**TITLE:** Jurisdictional, socioeconomic and gender inequalities in child health and development:  
Analysis of a national census of 5 year olds in Australia

**AUTHORS:** Brinkman, S.A.<sup>1,2</sup>, Gialamas, A.<sup>3</sup>, Rahman, A.<sup>3</sup>, Mittinty M.N.<sup>3</sup>, Gregory, T<sup>1</sup>,  
Silburn, S.<sup>1,4</sup>, Goldfeld, S.<sup>5,6</sup>, Zubrick, S.R.<sup>1</sup>, Carr, V.<sup>7,8</sup>, Janus, M.<sup>9</sup>, Hertzman, C.<sup>10</sup>, Lynch J.W.<sup>3,11</sup>

1. Telethon Institute for Child Health Research, Centre for Child Health Research, The University of Western Australia, Perth, Australia.
2. Health Sciences, Curtin University, Perth, Australia.
3. School of Population Health, Discipline of Public Health, The University of Adelaide, Adelaide, Australia.
4. Menzies School of Health Sciences, Darwin, Australia.
5. Centre for Community Child Health, Royal Childrens Hospital, Melbourne, Australia.
6. Murdoch Children's Research Institute, The University of Melbourne, Melbourne, Australia.
7. School of Psychiatry, Faculty of Medicine, The University of New South Wales, Sydney, Australia.
8. Schizophrenia Research Institute, Sydney, Australia
9. Offord Centre for Child Studies, McMaster University, Hamilton, Canada.
10. Human Early Learning Partnership, The University of British Columbia, Vancouver, Canada.
11. School of Social and Community Medicine, The University of Bristol, Bristol, UK.

1  
2 **Correspondence concerning this article should be sent to:**  
3

4 Sally Brinkman

5  
6 Adelaide Branch,

7  
8 Telethon Institute for Child Health Research,

9  
10 Level 8, 31 Flinders Street,

11  
12 ADELAIDE, South Australia 5000.

13  
14 [sallyb@ichr.uwa.edu.au](mailto:sallyb@ichr.uwa.edu.au)

15  
16 Phone: +61 419814800

17  
18 Fax: +61 8 9489 7700  
19  
20  
21  
22  
23

24 **KEY WORDS:** Social Epidemiology, Inequality, Public Health Policy, Child Health and  
25  
26 Development, Australia  
27  
28  
29

30 **WORD COUNT:** 5977.  
31  
32  
33  
34  
35  
36  
37  
38  
39  
40  
41  
42  
43  
44  
45  
46  
47  
48  
49  
50  
51  
52  
53  
54  
55  
56  
57  
58  
59  
60

**ARTICLE SUMMARY BOX:****Article Focus**

- This study presents the first ever population wide census of child development across an entire country; Australia.
- There are large inequalities in child development across jurisdictions and socio-demographic groups, showing that disparities in child development emerge early in life.

**Key Messages**

- High quality population monitoring and data linkage systems are essential to inform progressive universalist policy approaches.
- Jurisdictional differences in child development persist after controlling for socio-economic and demographic factors. Differing jurisdictional policies, and levels of service provision that support children and their families from birth to school age may contribute to inequalities in child development across the country.

**Strengths and limitations**

- These results are based on a developmental census of Australian children, with a large sample of 261,147 children, representing approximately 97.5% of the estimated five-year-old population.
- Further research is needed to understand whether these jurisdictional differences in child development can be attributed to different government policies and service provision.

**STRUCTURED ABSTRACT:**

**Objectives:** Early child development may have important consequences for inequalities in health and wellbeing. This paper explores population level patterns of child development across Australian jurisdictions, considering socioeconomic and demographic characteristics.

**Design:** Census of child development across Australia.

**Setting and participants:** Teachers complete a developmental checklist, the Australian Early Development Index (AEDI), for all children in their first year of fulltime schooling. Between May and July 2009, the AEDI was collected by 14,628 teachers in primary schools (government and non-government) across Australia, providing information on 261,147 children (approximately 97.5% of the estimated five-year-old population).

**Outcome measures:** Level of developmental vulnerability in Australian children for five developmental domains: physical wellbeing, social competence, emotional maturity, language and cognitive skills, and communication skills and general knowledge.

**Results:** The results show demographic and socioeconomic inequalities in child development as well as within and between jurisdiction inequalities. The magnitude of the overall level of inequality in child development and the impact of covariates varies considerably both between and within jurisdiction by sex. For example, the difference in overall developmental vulnerability between the best and worst performing jurisdiction is 12.5% for males and 7.1% for females. Levels of absolute social inequality within jurisdictions range from 8.2% for females and 12.7% for males.

**Conclusions:** The different mix of universal and targeted services provided within jurisdictions from pregnancy to age 5 may contribute to inequality across the country. These results illustrate the potential utility of a developmental census to shed light on the impact of differences in universal and targeted services to support child development by school entry.

## Introduction

Governments are becoming increasingly interested in the early determinants of children's health, development and wellbeing in order to inform services needed to better support children and their families. It is recognised that the opportunities for prevention and public health interventions will be enhanced the more we understand the early pathways to poorer health and development [1] and that to have an impact on health inequalities will require us to address the social determinants of early child health, development and wellbeing [2]. However, appropriate service and systemic improvements for reducing developmental inequalities requires an understanding of the patterns of child health and development across population groups and geographies in order to underpin a progressive universal portfolio of services [3].

Socioeconomic gradients in child health and development mean that providing services primarily to the disadvantaged will not eliminate population health burdens [4]. Children from all social and economic backgrounds may suffer poor health and development, albeit that those in the most disadvantaged circumstances have a disproportionate share of poor health and development. To reduce the steepness of the social gradient in health, actions to influence development must be universal, but be implemented with a scale and intensity that is proportionate to the level of disadvantage [2] – an approach termed progressive or proportionate universalism.

Measuring the developmental effects of proportionate universalism requires substantial effort in the form of establishing early and developmentally relevant baseline measures with ongoing capacity to monitor progress over time. An added challenge entails demonstrating that improvements in early development, translate into improvements in later human capability [5]. This requires longitudinal measurement to ascertain lifecourse developmental effects. An essential starting point is quantification of the overall level, and the absolute and relative inequality in child health and development across the population.

The global challenge to improve early child health and development requires an instrument that can be used across the population, be compared over time for monitoring and is sensitive

1  
2  
3  
4  
5  
6  
7  
8  
9  
10  
11  
12  
13  
14  
15  
16  
17  
18  
19  
20  
21  
22  
23  
24  
25  
26  
27  
28  
29  
30  
31  
32  
33  
34  
35  
36  
37  
38  
39  
40  
41  
42  
43  
44  
45  
46  
47  
48  
49  
50  
51  
52  
53  
54  
55  
56  
57  
58  
59  
60

enough to evaluate programs. A measure used internationally would additionally enable such comparisons both within and across countries. The current basic health statistics collected early in life to compare the progress of countries include infant, maternal and child mortality rates, breastfeeding and immunisation rates [6]. Other measures of progress such as the Programme for International Student Assessment [7] provide cross-national comparisons of educational performances and are collected much later in child development. These efforts have contributed substantially to sustained cross-national financial and programmatic commitments to lift human development outcomes within nations [8].

Notwithstanding the significance of these measures, we should be seeking indicators that not only determine whether children are surviving but how well populations of children are actually developing between birth and school entry. This is now recognized by organizations such as the OECD and the World Bank which are promoting the use of internationally comparable instruments to measure child development and wellbeing [9 10]. The implications for monitoring child development are also highlighted by the United Nations Convention on the Rights of the Child [11] as each of the signatory countries is responsible for providing children with the opportunities necessary to develop physical, cognitive, social and emotional capabilities in early life.

Transition to school is seen as one of the best stages in a child's life to measure child development and wellbeing [12-14]. Research has established that children at higher risk for suboptimal development can be better prepared for initial success at school through early childhood education, family support, paediatric and allied health care interventions and child health programs [15]. When children come to school with the developmental capacity to take advantage of the education system, coupled with a high quality education system, the initial positive effects persist into adolescence and adulthood [15].

In 2007, the Council of Australian Governments endorsed the Australian Early Development Index (AEDI) as a national progress measure of early childhood health and development [16]. The AEDI is a population measure of children's development covering five developmental domains:

1 physical health and well-being, social competence, emotional maturity, language and cognitive  
2 skills, and communication skills and general knowledge. The instrument is based on the Canadian  
3 Early Development Instrument and has been used in Australia since 2002 [17]. In 2009 the AEDI  
4 was collected for almost every child across Australia in their first year of full time schooling. This  
5 represents the first effort by any country to conduct a ‘child development census’ with information  
6 collected on more than 261,000 children representing 97.5% of the age-eligible population [18].  
7  
8 The Australian federal government has now committed to repeating the AEDI census every three  
9 years. The monitoring of child development and wellbeing over time and across the whole  
10 population enables local communities to determine if they are making improvements and fosters the  
11 relative comparison of communities and populations subgroups [19]. This commitment to tracking  
12 and reporting early childhood outcomes across the entire population, underlines the federal  
13 government’s leadership role in providing communities and governments with evidence-based  
14 information for policy and service evaluation.  
15  
16  
17  
18  
19  
20  
21  
22  
23  
24  
25  
26  
27  
28  
29  
30  
31  
32

### 33 *The Australian Context*

34  
35 Australia is a federated democracy that has three tiers of government: federal, state and  
36 local. Funding towards early child health and development at a federal level is delivered through  
37 various departments including the Department of Education, Employment and Workplace  
38 Relations, Department of Families, Housing, Community Services and Indigenous Affairs and the  
39 Department of Health and Ageing. The federal government has annual contract negotiations,  
40 passing monies over to the jurisdictions, for them to deliver agreed services and to assist with  
41 national health reform.  
42  
43  
44  
45  
46  
47  
48  
49

50 Although the six states join together to form the Commonwealth of Australia, they are  
51 constituted with the power to make laws and policies through their own legislative, executive and  
52 judicial functions. Australia also has two principal territories, the Australian Capital Territory  
53 (ACT) and the Northern Territory (NT), which constitutionally are directly subject to the  
54  
55  
56  
57  
58  
59  
60

1 Commonwealth government. These eight State and Territory Governments provide the bulk of early  
2 childhood services, with differing levels and approaches to service delivery. Local governments  
3 make up the third tier and are established by state and territory governments to take responsibility  
4 for a number of community based services. Of the total health expenditure in Australia, 42.7% is  
5 contributed by the federal government, 25.3% by state, territory and local governments, and the  
6 remainder is covered by individuals, non-government agencies and private industry [20].  
7  
8  
9  
10  
11  
12  
13  
14

15 Australia is the earth's biggest island and the sixth-largest country in the world in land area.  
16 It is a culturally diverse society with a population of more than 22 million [21]. Australia's  
17 population includes Aboriginal and Torres Strait Islander peoples and migrants from some 200  
18 countries with Indigenous Australian peoples representing 2.5% of the total population [22]. In  
19 over 60 years of planned post-war migration, Australia has accepted more than 6.5 million migrants  
20 and in the most recent census (2006), 3.1 million people (16% of the population) were reported to  
21 speak a language other than English at home [23]. The majority of the population lives in the cities  
22 mainly located around the coast, however many live in rural and remote areas ranging from dry arid  
23 land to tropical and a few live in what are arguably some of the most remote and untouched areas of  
24 the world.  
25  
26  
27  
28  
29  
30  
31  
32  
33  
34  
35  
36

37 Australia's income inequality has been steadily increasing [24] but it ranks second after  
38 Norway on the most recent Human Development Index (HDI) results [25]. The plight of the  
39 Aboriginal and Torres Strait Islander population however remains one of Australia's most  
40 concerning inequalities. Separate HDI estimates for Australian Aboriginal and Torres Strait  
41 Islanders ranked this subpopulation at about 104<sup>th</sup> – between Cape Verde and China [26]. The most  
42 recent report from Australia's Productivity Commission notes that there has been little change for  
43 Aboriginal people on measures of literacy and numeracy, most health indicators and in proportions  
44 living in overcrowded housing. Rates of child abuse and neglect substantiations and adult  
45 imprisonment have increased for Aboriginal people, but there has been recent improvement in  
46  
47  
48  
49  
50  
51  
52  
53  
54  
55  
56  
57  
58  
59  
60



1 juvenile detention rates [22]. Low birth weight rates are two and a half times higher than for  
2 children born to non-Aboriginal mothers [22].  
3  
4

5  
6 The multicultural context of Australia, its geographical size and climatic variation, along  
7 with multi-tiered political governance and service delivery highlights the complexity faced when  
8 aiming to both understand and reduce inequality in child health and development. The objective of  
9 this study is to use the national AEDI census data to examine jurisdictional, geographic,  
10 socioeconomic and gender inequality in child health and development across Australia.  
11  
12  
13  
14  
15  
16  
17  
18  
19

## 20 **Methods**

21 To support broad access to the AEDI data the Australian Government through the  
22 Department of Education, Employment and Workplace Relations made available in 2011 a  
23 Confidentialised Unit Record File (CURF) for researchers. In order to protect the privacy of  
24 individual children the data were confidentialised by removing the child's name and date of birth,  
25 restricting potentially identifying information, and where the information was considered to present  
26 a risk of identifying individuals the data were restricted and/or "perturbed" however details of this  
27 process conducted by the Australian Bureau of Statistics are confidential [27]. This, in combination  
28 with the unavailability of a socio-economic indicator for the Northern Territory resulted in the  
29 removal of the territory from the analytical models. The AEDI CURF does not include the  
30 individual items that comprise the AEDI and only provides categorised data on the summary AEDI  
31 domain scores and a limited range of socio-demographic characteristics such as state of residence,  
32 gender, and remoteness [28].  
33  
34  
35  
36  
37  
38  
39  
40  
41  
42  
43  
44  
45  
46  
47  
48  
49  
50

### 51 *Study population*

52  
53 Between May and July 2009, all schools (government and non-government) across all states  
54 and territories in Australia participated in the AEDI. As shown in Figure 1, information for 261,147  
55 children in their first year of full-time school was collected by 14,628 teachers across Australia.  
56  
57  
58  
59  
60

1  
2 This number of children represents a 97.5% participation rate when compared to the expected  
3  
4 population of 5 year olds. The number of children we were expecting (267,843) was based on the  
5  
6 Australian Bureau of Statistics Estimated Resident Population for five-year-olds, 31 March 2009  
7  
8 [29]. Of the children that did participate in the AEDI data collection, 89.6% (n=233,960)  
9  
10 contributed to the analysis with 117,937 males and 116,023 females, and their characteristics are  
11  
12 provided in Table 1. The sample analysed thus represents 87.3% of the total population. The vast  
13  
14 majority of children live in major cities, with the most populous states being New South Wales,  
15  
16 Victoria and Queensland. Four per cent of the children were of Aboriginal or Torres Strait Islander  
17  
18 descent and approximately 12% of all children spoke English as a second language. The AEDI was  
19  
20 not completed for children whose parent/guardian opted-out or in the situation where the teacher  
21  
22 had known the child for less than one month and felt that they didn't know the child well enough to  
23  
24 complete the checklist [18].  
25  
26  
27  
28  
29  
30  
31  
32  
33  
34  
35  
36  
37  
38  
39  
40  
41  
42  
43  
44  
45  
46  
47  
48  
49  
50  
51  
52  
53  
54  
55  
56  
57  
58  
59  
60

Table 1: Socio-demographic characteristics of children for whom an AEDI was completed and contributed to the analysis

| Characteristics                              | Male (n=117,937)<br>n (column %) | Female (n=116,023)<br>n (column %) |
|----------------------------------------------|----------------------------------|------------------------------------|
| <b>State</b>                                 |                                  |                                    |
| New South Wales                              | 41,465 (35.2)                    | 40,657 (35.0)                      |
| Victoria                                     | 28,286 (23.9)                    | 28,400 (24.5)                      |
| Tasmania                                     | 2,855 (2.4)                      | 2,785 (2.4)                        |
| Australian Capital Territory                 | 2,114 (1.8)                      | 2,021 (1.7)                        |
| South Australia                              | 7,282 (6.2)                      | 7,221 (6.2)                        |
| Western Australia                            | 13,112 (11.1)                    | 12,633 (10.9)                      |
| Queensland                                   | 22,823 (19.4)                    | 22,306 (19.2)                      |
| <b>Aboriginal Torres Strait Islander</b>     |                                  |                                    |
| Yes                                          | 4,668 (4.0)                      | 4,766 (4.1)                        |
| No                                           | 113,269 (96.0)                   | 111,257 (96.0)                     |
| <b>English as a second language</b>          |                                  |                                    |
| Yes                                          | 14,865 (12.6)                    | 14,043 (12.1)                      |
| No                                           | 103,072 (87.4)                   | 101,980 (87.9)                     |
| <b>Mean SEIFA IRSAD (<math>\pm</math>SD)</b> | 6.29 (2.98)                      | 6.27 (2.99)                        |

## *Outcome*

The AEDI is the outcome measure used to assess children's development. The Index is an adapted version of the Canadian Early Development Instrument [16 30]. Both the Canadian and the Australian version of the instrument have been shown to have sound validity [30-35]. The AEDI is an 95-item, teacher completed questionnaire designed to measure five domains of child development: Physical health and wellbeing, Language and cognitive skills, Emotional maturity, Social competence, and Communication skills and general knowledge [36].

Teachers complete the AEDI for each child in their class on the basis of their knowledge of the children. Children are not required to be present when the information is entered into the secure web-based data entry system. Each item on the checklist is either dichotomous (yes/no) or a Likert scale response (e.g. very good/good; average; poor/very poor). The data were collected across the country over a three month time period (May to July 2009).

Domain scores range between 0 and 10 and are calculated as a mean score of all valid answers. Higher scores indicate a higher level of development for that domain. Children who score below the 10<sup>th</sup> percentile of the national AEDI population for an individual domain (e.g. emotional maturity) are categorized as 'developmentally vulnerable' with all other children categorized as 'not developmentally vulnerable' for that domain. The classification of developmentally vulnerable is age standardized, with the 10<sup>th</sup> percentile calculated for 4 year olds, 5 year olds and 6 year olds separately. The National Progress Measure is the proportion of children who are developmentally vulnerable on one or more of the five domains.

## *Covariates*

### *Index of Relative Socio-economic Advantage and Disadvantage (SEIFA IRSAD)*

The Australian Bureau of Statistics releases on the basis of census information four different Socio-Economic Indices For Areas (SEIFA). The SEIFA indices are generally known as an indicator of people's "access to material and social resources and their ability to participate in

1 society; relative to what is commonly experienced or accepted by the wider community” [36]. The  
2 index utilised for this manuscript was the Index of Relative Socio-economic Advantage and  
3 Disadvantage (SEIFA IRSAD) [37]. The SEIFA IRSAD index is calculated via Principal  
4 Components Analysis using 21 indicator variables from the census. The index is ordinal and ranges  
5 from around 200 to 1200 with a mean of 1000 and standard deviation of 100, however, this score  
6 has been categorised to deciles as part of the confidentialisation process undertaken by the ABS  
7 with the lowest decile representing the most disadvantaged areas [37].

8 The index reflects the average socio-economic status of people and households in the area.  
9 SEIFA IRSAD has been applied to the AEDI data file on the basis of the child’s suburb  
10 (neighbourhood) of residence [28]. A suburb is determined by the Local Council and helps define a  
11 household’s address. Suburbs vary widely in population density, depending on the housing types  
12 and distance from the central city. In general, when a person is asked where they live by another  
13 person residing within that same State, they generally respond to the question with their suburb of  
14 residence. In the rural and remote areas where suburbs do not exist, SEIFA IRSAD was applied at  
15 the smallest level of geography on the basis of their address details provided by the teacher upon  
16 completing the AEDI [28]. Where possible the Australian Bureau of Statistic’s Geospatial unit  
17 called Collection Districts were assigned to the address details of the child. Collection Districts  
18 have no meaning to people as they are simply the collection district in which a census collector  
19 works. The geographical size of Collection Districts (CDs) varies across Australia particularly in  
20 the rural and remote areas; however a technical report published by the Australian Bureau of  
21 Statistics shows the robustness of SEIFA [37].

#### 22 *Aboriginal and Torres Strait Islander.*

23 Aboriginal and Torres Strait Islander (ATSI) background is collected with the AEDI. ATSI  
24 was recorded on the basis of school enrolment records, and thus reflects the parent/guardian’s report  
25 of their child’s ATSI status.

### *English as a Second Language*

Teachers classified children as having English as a Second Language (ESL) where English was not their first language and where they needed additional instruction in English or where their English was not yet proficient.

### *Statistical analyses*

A dichotomous variable was created indicating whether the child was in the bottom 10<sup>th</sup> percentile (developmentally vulnerable) or not for each of the five domains, and developmentally vulnerable on one or more domains. Children, were excluded in the calculation of developmentally vulnerable on one or more domain if they were; identified as having special needs, were recorded as three years old, or had less than four valid domain scores (n=11,484) [18 39]. In Australia, children should not be attending full time schooling if they are only three years old, and were therefore excluded.

As our primary interest was to investigate jurisdictional and socioeconomic inequality of child developmental vulnerability we utilised two nested fixed-effects logistic regression models. Model 1 considers only state as the covariate. For being developmentally vulnerable on one or more domain (DV1<sup>+</sup>) variable the model is:

$$\text{logit} \left[ p_{ij} \left( dv1^+ = 1 \right) \right] = \alpha + \beta_j (state_{ij}), \quad (1)$$

where  $p_{ij} \left( dv1^+ = 1 \right)$  is the probability of a child being developmentally vulnerable on one or more domains for the  $i^{\text{th}}$  observation in the  $j^{\text{th}}$  class of the state variable,  $\alpha$  is the intercept and  $\beta_j$  is the coefficient for the state. Model 2 considers three additional covariates for jurisdictional variation of child vulnerability. Again for same dependent variable DV1<sup>+</sup> the full model is defined as,

$$\text{logit}\left[p_{ij}(dV1^+ = 1)\right] = \alpha + \beta_{1j}(\text{state}_{ij}) + \beta_{2j}(\text{ATSI}_{ij}) + \beta_{3j}(\text{ESL}_{ij}) + \beta_{4j}(\text{SEIFA}_{ij}), \quad (2)$$

where  $\beta_{1j}$ ,  $\beta_{2j}$ ,  $\beta_{3j}$ , and  $\beta_{4j}$  are the coefficients for four covariates: state, Aboriginal and Torres Strait Islander (ATSI) status, English as a second language (ESL) status and SEIFA IRSAD, respectively. All models are estimated separately for males and females. Similar models are used for each of the domain specific outcomes.

To examine socioeconomic inequalities in developmental vulnerability we computed the slope index of inequality (SII) [40 41]. In this circumstance we use the SII to measure the absolute developmental vulnerability gap between the lowest and highest SEIFA IRSAD deciles within jurisdictions in Australia. The computational process of creating the SII is:

- 1) Compute the proportion of total children ( $t_i$ ) for the ordered (lowest to highest) classes of SEIFA IRSAD deciles ( $i = 1, 2, \dots, 10$ );
- 2) Compute the cumulative proportion of children for each SEIFA IRSAD class ( $c_i$ ) and then give a score based on the midpoint of its range in the cumulative distribution in the children (i.e.  $x_i = c_{i-1} + t_i/2$ );
- 3) Compute the proportion of developmentally vulnerable children for  $i^{\text{th}}$  class ( $r_i$ ); and
- 4) Values of  $r_i$  then are plotted against the values of  $x_i$  and a regression line is fitted to the data.

Thus, the SII is the absolute value of the slope coefficient of the regression line from lowest to highest SEIFA IRSAD score.

The SII was calculated separately for males and females. All analyses were carried out using SAS software Version 9.2.

## Results

1  
2  
3  
4  
5  
6  
7  
8  
9  
10  
11  
12  
13  
14  
15  
16  
17  
18  
19  
20  
21  
22  
23  
24  
25  
26  
27  
28  
29  
30  
31  
32  
33  
34  
35  
36  
37  
38  
39  
40  
41  
42  
43  
44  
45  
46  
47  
48  
49  
50  
51  
52  
53  
54  
55  
56  
57  
58  
59  
60

Table 2 shows the association between geographic and socio-demographic characteristics and the probability of being developmentally vulnerable on one or more AEDI domain by sex. Aboriginal and Torres Strait Islander children were more likely to be developmentally vulnerable compared to non-ATSI children (OR 2.16 males; 95% CI, 2.03-2.30 OR 2.42 females; 95% CI, 2.27-2.58); those for whom English was not their first language were more likely to be developmentally vulnerable (OR 2.06 males; 95% CI, 1.99-2.14 OR 2.43 females; 95% CI, 2.33-2.54); and for every decile increase in SEIFA IRSAD there was a decreasing odds of being developmentally vulnerable (OR 0.92 males; 95% CI, 0.91-0.92 and OR 0.91 females; 95% CI, 0.90-0.91).

Model 1 in Table 2 shows that for both sexes, compared to New South Wales (reference group), children living in Queensland had the highest odds (OR 1.70 males; 95% CI, 1.64-1.75 and OR females 1.42; 95% CI, 1.37-1.49) of being developmentally vulnerable followed by children living in Western Australia, South Australia, Australian Capital Territory, Tasmania and Victoria. After adjusting for ATSI, ESL and SEIFA IRSAD (Model 2) Queensland children for both sexes remained the most developmentally vulnerable (OR 1.80 males; 95% CI, 1.74-1.87 and OR females 1.52; 95% CI, 1.46-1.59). However, after adjustment, compared to Model 1, there was a shift in the ranking of developmental vulnerability by jurisdiction, with the odds of vulnerability increasing substantially for children living in the Australian Capital Territory and Western Australia.



Table 2: Odd ratios (95% CI) estimates for children developmentally vulnerable on one or more domains by geographic and sociodemographic characteristics in Australia

|                                                            | Developmentally vulnerable on one or more domains |                    |                    |                    |
|------------------------------------------------------------|---------------------------------------------------|--------------------|--------------------|--------------------|
|                                                            | Male (N=117937)                                   |                    | Female (N=116023)  |                    |
|                                                            | Model 1                                           | Model 2            | Model 1            | Model 2            |
| <i>Geographic variables</i>                                |                                                   |                    |                    |                    |
| State                                                      |                                                   |                    |                    |                    |
| New South Wales                                            | reference                                         |                    |                    |                    |
| Australian Capital Territory                               | 1.10 (1.00 - 1.21)                                | 1.55 (1.41 - 1.71) | 0.94 (0.83 - 1.07) | 1.42 (1.25 - 1.61) |
| Queensland                                                 | 1.70 (1.64 - 1.75)                                | 1.80 (1.74 - 1.87) | 1.42 (1.37 - 1.49) | 1.52 (1.46 - 1.59) |
| South Australia                                            | 1.14 (1.08 - 1.20)                                | 1.11 (1.04 - 1.17) | 1.01 (0.95 - 1.09) | 0.97 (0.90 - 1.04) |
| Tasmania                                                   | 1.10 (1.02 - 1.20)                                | 1.04 (0.96 - 1.14) | 0.92 (0.83 - 1.03) | 0.88 (0.79 - 0.98) |
| Victoria                                                   | 0.98 (0.94 - 1.01)                                | 1.06 (1.02 - 1.10) | 0.88 (0.85 - 0.92) | 0.98 (0.94 - 1.02) |
| Western Australia                                          | 1.26 (1.21 - 1.32)                                | 1.38 (1.32 - 1.44) | 1.12 (1.06 - 1.18) | 1.24 (1.17 - 1.31) |
| <i>Sociodemographic variables</i>                          |                                                   |                    |                    |                    |
| Aboriginal and Torres Strait Islander                      |                                                   |                    |                    |                    |
| No                                                         | reference                                         |                    |                    |                    |
| Yes                                                        |                                                   | 2.16 (2.03 - 2.30) |                    | 2.42 (2.27 - 2.58) |
| English second language                                    |                                                   |                    |                    |                    |
| No                                                         | reference                                         |                    |                    |                    |
| Yes                                                        |                                                   | 2.06 (1.99 - 2.14) |                    | 2.43 (2.33 - 2.54) |
| Socioeconomic advantage & disadvantage index (SEIFA IRSAD) |                                                   |                    |                    |                    |
|                                                            |                                                   | 0.92 (0.91 - 0.92) |                    | 0.91 (0.90 - 0.91) |

1  
2  
3  
4  
5  
6  
7  
8  
9  
10  
11  
12  
13  
14  
15  
16  
17  
18  
19  
20  
21  
22  
23  
24  
25  
26  
27  
28  
29  
30  
31  
32  
33  
34  
35  
36  
37  
38  
39  
40  
41  
42  
43  
44  
45  
46  
47  
48  
49  
50  
51  
52  
53  
54  
55  
56  
57  
58  
59  
60

Results presented in Tables 3 and 4 show the association between geographic and socio-demographic characteristics and the probability of being developmentally vulnerable on each AEDI domain by sex. The general pattern showing large jurisdictional differences after controlling for the covariates is consistent across each of the five developmental domains with children in Queensland and the Australian Capital Territory showing higher vulnerability compared to children living in the other jurisdictions. In Queensland, when looking across the five domains, there is little difference found between the odds ratios in Models 1 and 2 for physical health and wellbeing, social competence and emotional maturity. However, controlling for the covariates increases the odds of vulnerability for both language and cognitive and communication and general skills. This pattern is consistent across males and females. Contrary to this, children living in the Australian Capital Territory show increased odds across all five developmental domains when controlling for covariates.

For all five domains, both Aboriginal and Torres Strait Islander (ATSI) and English as a Second Language (ESL) children have increased odds of vulnerability compared to non-ATSI and non-ESL children respectively. It is noteworthy that inequality between ATSI and non-ATSI children is greater for females than for males. For instance, on the physical health and wellbeing domain, the odds ratio for male ATSI children is 1.81 (CI 1.68-1.95) compared with 2.38 for female ATSI children (CI 2.19-2.58). For ATSI children the greatest inequality when compared to non-ATSI is for the Language and cognitive development domain (OR 2.59 males; 95% CI, 2.42-2.78 and OR females 3.01; 95% CI, 2.78-3.25). For children with ESL status the highest ORs were found for the Communication skills and general knowledge domain with 4.19 (95% CI, 4.01-4.37) for males and 5.16 (95% CI, 4.89-5.44) for females.

Table 3: Odd ratios (95% CI) for male children developmentally vulnerable on each domain by jurisdiction and sociodemographic characteristics (N=117937)

|                                                            | Developmentally vulnerable on each sub-domain |                       |                       |                       |                       |                       |                             |                       |                                |                       |
|------------------------------------------------------------|-----------------------------------------------|-----------------------|-----------------------|-----------------------|-----------------------|-----------------------|-----------------------------|-----------------------|--------------------------------|-----------------------|
|                                                            | Physical health & wellbeing                   |                       | Social competence     |                       | Emotional maturity    |                       | Language & cognitive skills |                       | Communication & general skills |                       |
|                                                            | Model 1                                       | Model 2               | Model 1               | Model 2               | Model 1               | Model 2               | Model 1                     | Model 2               | Model 1                        | Model 2               |
| State                                                      |                                               |                       |                       |                       |                       |                       |                             |                       |                                |                       |
| New South Wales (r)                                        |                                               |                       |                       |                       |                       |                       |                             |                       |                                |                       |
| Australian Capital Territory                               | 1.20<br>(1.05 - 1.37)                         | 1.62<br>(1.42 - 1.86) | 1.07<br>(0.94 - 1.22) | 1.44<br>(1.26 - 1.64) | 1.21<br>(1.07 - 1.38) | 1.57<br>(1.37 - 1.78) | 1.02<br>(0.87 - 1.21)       | 1.72<br>(1.45 - 2.04) | 1.04<br>(0.90 - 1.19)          | 1.62<br>(1.40 - 1.86) |
| Queensland                                                 | 1.39<br>(1.32 - 1.45)                         | 1.37<br>(1.30 - 1.44) | 1.50<br>(1.43 - 1.57) | 1.52<br>(1.45 - 1.59) | 1.60<br>(1.52 - 1.67) | 1.57<br>(1.50 - 1.65) | 3.27<br>(3.11 - 3.43)       | 3.46<br>(3.29 - 3.64) | 1.27<br>(1.21 - 1.33)          | 1.52<br>(1.44 - 1.60) |
| South Australia                                            | 1.21<br>(1.12 - 1.30)                         | 1.12<br>(1.04 - 1.21) | 1.22<br>(1.13 - 1.31) | 1.15<br>(1.07 - 1.24) | 1.48<br>(1.38 - 1.59) | 1.38<br>(1.29 - 1.49) | 1.02<br>(0.93 - 1.12)       | 0.94<br>(0.85 - 1.04) | 0.89<br>(0.82 - 0.97)          | 0.94<br>(0.86 - 1.02) |
| Tasmania                                                   | 1.19<br>(1.06 - 1.33)                         | 1.03<br>(0.92 - 1.16) | 1.07<br>(0.95 - 1.20) | 0.97<br>(0.86 - 1.09) | 1.25<br>(1.12 - 1.40) | 1.10<br>(1.09 - 1.20) | 1.48<br>(1.30 - 1.67)       | 1.30<br>(1.14 - 1.48) | 0.80<br>(0.70 - 0.91)          | 0.93<br>(0.81 - 1.06) |
| Victoria                                                   | 0.90<br>(0.86 - 0.95)                         | 0.95<br>(0.90 - 0.99) | 0.98<br>(0.93 - 1.02) | 1.03<br>(0.99 - 1.08) | 1.15<br>(1.09 - 1.20) | 1.19<br>(1.13 - 1.25) | 1.06<br>(1.00 - 1.12)       | 1.18<br>(1.12 - 1.25) | 0.93<br>(0.89 - 0.98)          | 1.08<br>(1.02 - 1.13) |
| Western Australia                                          | 1.23<br>(1.16 - 1.30)                         | 1.28<br>(1.20 - 1.36) | 0.90<br>(0.84 - 0.96) | 0.94<br>(0.88 - 1.00) | 1.22<br>(1.15 - 1.29) | 1.26<br>(1.19 - 1.34) | 2.31<br>(2.17 - 2.45)       | 2.57<br>(2.41 - 2.73) | 1.04<br>(0.98 - 1.10)          | 1.22<br>(1.14 - 1.30) |
| Aboriginal and Torres Strait Islander                      |                                               |                       |                       |                       |                       |                       |                             |                       |                                |                       |
| No (r)                                                     |                                               |                       |                       |                       |                       |                       |                             |                       |                                |                       |
| Yes                                                        |                                               | 1.81<br>(1.68 - 1.95) |                       | 1.78<br>(1.66 - 1.92) |                       | 1.59<br>(1.48 - 1.71) |                             | 2.59<br>(2.42 - 2.78) |                                | 2.10<br>(1.95 - 2.27) |
| English second language                                    |                                               |                       |                       |                       |                       |                       |                             |                       |                                |                       |
| No (r)                                                     |                                               |                       |                       |                       |                       |                       |                             |                       |                                |                       |
| Yes                                                        |                                               | 1.29<br>(1.23 - 1.36) |                       | 1.48<br>(1.41 - 1.55) |                       | 1.19<br>(1.13 - 1.25) |                             | 1.94<br>(1.84 - 2.04) |                                | 4.19<br>(4.01 - 4.37) |
| Socioeconomic advantage & disadvantage index (SEIFA IRSAD) |                                               | 0.92<br>(0.92 - 0.93) |                       | 0.93<br>(0.92 - 0.93) |                       | 0.93<br>(0.92 - 0.94) |                             | 0.88<br>(0.88 - 0.89) |                                | 0.92<br>(0.91 - 0.92) |

Table 4: Odd ratios (95% CI) for female children developmentally vulnerable on each domain by jurisdiction and sociodemographic characteristics (N=116023)

|                                                            | Developmentally vulnerable on each sub-domain |                       |                       |                       |                       |                       |                             |                       |                                |                       |
|------------------------------------------------------------|-----------------------------------------------|-----------------------|-----------------------|-----------------------|-----------------------|-----------------------|-----------------------------|-----------------------|--------------------------------|-----------------------|
|                                                            | Physical health & wellbeing                   |                       | Social competence     |                       | Emotional maturity    |                       | Language & cognitive skills |                       | Communication & general skills |                       |
|                                                            | Model 1                                       | Model 2               | Model 1               | Model 2               | Model 1               | Model 2               | Model 1                     | Model 2               | Model 1                        | Model 2               |
| State                                                      |                                               |                       |                       |                       |                       |                       |                             |                       |                                |                       |
| New South Wales (n)                                        |                                               |                       |                       |                       |                       |                       |                             |                       |                                |                       |
| Australian Capital Territory                               | 0.93<br>(0.77 - 1.13)                         | 1.42<br>(1.87 - 1.72) | 0.90<br>(0.73 - 1.10) | 1.32<br>(1.08 - 1.63) | 1.26<br>(1.01 - 1.57) | 1.82<br>(1.46 - 2.28) | 0.87<br>(0.69 - 1.09)       | 1.54<br>(1.22 - 1.95) | 0.85<br>(0.70 - 1.03)          | 1.36<br>(1.12 - 1.65) |
| Queensland                                                 | 1.22<br>(1.14 - 1.30)                         | 1.16<br>(1.09 - 1.24) | 1.36<br>(1.28 - 1.45) | 1.35<br>(1.26 - 1.44) | 1.53<br>(1.41 - 1.65) | 1.47<br>(1.36 - 1.60) | 2.59<br>(2.43 - 2.76)       | 2.67<br>(2.50 - 2.86) | 1.01<br>(0.94 - 1.07)          | 1.23<br>(1.15 - 1.31) |
| South Australia                                            | 1.11<br>(1.01 - 1.23)                         | 0.99<br>(0.90 - 1.10) | 1.04<br>(0.94 - 1.16) | 0.96<br>(0.86 - 1.07) | 1.34<br>(1.18 - 1.51) | 1.21<br>(1.07 - 1.36) | 1.06<br>(0.94 - 1.20)       | 0.96<br>(0.85 - 1.09) | 0.78<br>(0.70 - 0.87)          | 0.80<br>(0.72 - 0.90) |
| Tasmania                                                   | 1.15<br>(0.99 - 1.33)                         | 0.95<br>(0.81 - 1.10) | 0.84<br>(0.70 - 1.00) | 0.73<br>(0.61 - 0.88) | 0.90<br>(0.73 - 1.12) | 0.76<br>(0.61 - 0.94) | 1.16<br>(0.97 - 1.38)       | 1.02<br>(0.85 - 1.22) | 0.63<br>(0.53 - 0.76)          | 0.77<br>(0.64 - 0.93) |
| Victoria                                                   | 0.84<br>(0.79 - 0.90)                         | 0.91<br>(0.85 - 0.97) | 0.90<br>(0.84 - 0.96) | 0.97<br>(0.90 - 1.03) | 1.10<br>(1.01 - 1.19) | 1.16<br>(1.07 - 1.26) | 1.01<br>(0.93 - 1.08)       | 1.14<br>(1.06 - 1.23) | 0.84<br>(0.79 - 0.89)          | 0.98<br>(0.92 - 1.04) |
| Western Australia                                          | 1.13<br>(1.04 - 1.22)                         | 1.16<br>(1.08 - 1.26) | 0.77<br>(0.70 - 0.84) | 0.80<br>(0.73 - 0.88) | 1.15<br>(1.04 - 1.28) | 1.19<br>(1.08 - 1.32) | 1.99<br>(1.84 - 2.16)       | 2.19<br>(2.02 - 2.38) | 0.83<br>(0.76 - 0.90)          | 0.98<br>(0.90 - 1.07) |
| Aboriginal and Torres Strait Islander                      |                                               |                       |                       |                       |                       |                       |                             |                       |                                |                       |
| No (n)                                                     |                                               |                       |                       |                       |                       |                       |                             |                       |                                |                       |
| Yes                                                        |                                               | 2.38<br>(2.19 - 2.58) |                       | 2.01<br>(1.83 - 2.20) |                       | 1.88<br>(1.69 - 2.10) |                             | 3.01<br>(2.78 - 3.25) |                                | 2.21<br>(2.02 - 2.42) |
| English second language                                    |                                               |                       |                       |                       |                       |                       |                             |                       |                                |                       |
| No (n)                                                     |                                               |                       |                       |                       |                       |                       |                             |                       |                                |                       |
| Yes                                                        |                                               | 1.24<br>(1.16 - 1.32) |                       | 1.56<br>(1.46 - 1.67) |                       | 1.23<br>(1.13 - 1.34) |                             | 2.13<br>(2.00 - 2.27) |                                | 5.16<br>(4.89 - 5.44) |
| Socioeconomic advantage & disadvantage index (SEIFA IRSAD) |                                               | 0.90<br>(0.89 - 0.91) |                       | 0.91<br>(0.90 - 0.91) |                       | 0.91<br>(0.90 - 0.92) |                             | 0.87<br>(0.86 - 0.88) |                                | 0.90<br>(0.90 - 0.91) |

1  
2  
3  
4 Figure 2 shows the joint variation across Australian states and territories of child  
5  
6 vulnerability on one or more domain according to 1) adjusted predicted average levels of  
7  
8 vulnerability in the state or territory and 2) the slope index of inequality (absolute) based on SEIFA  
9  
10 IRSAD. The predicted average levels of vulnerability were adjusted by ESL, ATSI and SEIFA  
11  
12 IRSAD. Ideally, jurisdictions should be in the bottom left-hand quadrant with lower overall levels  
13  
14 of vulnerability and lower absolute social inequality. A slope index of inequality (SII) figure of say  
15  
16 22 indicates that there is an absolute difference of 22 percentage point in developmental  
17  
18 vulnerability from the lowest to the highest SEIFA IRSAD decile. Thus the higher the SII value the  
19  
20 greater the absolute level of inequality within the State. The scales of the X-axes are the same to  
21  
22 show the lower overall vulnerability of females (median vulnerability about 15%) compared to  
23  
24 males (median vulnerability about 29%). Across all jurisdictions males experience higher inequality  
25  
26 and higher median levels of developmental vulnerability compared to females. For males and  
27  
28 females, the smallest levels of inequality and developmental vulnerability are found in New South  
29  
30 Wales and Tasmania whereas the largest inequalities and highest levels of developmental  
31  
32 vulnerability are found in Western Australia and Queensland. Children in Victoria and South  
33  
34 Australia have higher levels of inequality but lower vulnerability, while children in the Australian  
35  
36 Capital Territory experience lower levels of inequality yet higher vulnerability.  
37  
38  
39  
40  
41

42 The *inequality difference* between states varies significantly with the lowest and highest  
43  
44 levels of inequality for males being 12.6 (lowest level of inequality in Tasmania and highest level in  
45  
46 South Australia) and for females is 8.2 (lowest level of inequality found in the Australian Capital  
47  
48 Territory and highest inequality in Western Australia). The difference in *overall developmental*  
49  
50 *vulnerability* for males between the top (New South Wales) and bottom (Queensland) states is 12.5  
51  
52 percentage points and for females it is 7.1 (top=Tasmania and bottom=Queensland). The  
53  
54 magnitude of these inequalities varies considerably between and within jurisdiction by sex. The  
55  
56 difference in inequality between males and females is smallest in Tasmania (difference 1.24), then  
57  
58  
59  
60

1  
2  
3  
4  
5  
6  
7  
8  
9  
10  
11  
12  
13  
14  
15  
16  
17  
18  
19  
20  
21  
22  
23  
24  
25  
26  
27  
28  
29  
30  
31  
32  
33  
34  
35  
36  
37  
38  
39  
40  
41  
42  
43  
44  
45  
46  
47  
48  
49  
50  
51  
52  
53  
54  
55  
56  
57  
58  
59  
60

New South Wales (difference 2.03) followed by Victoria (difference 4.85), Queensland (difference 5.07), Western Australia (difference 5.83), and the Australian Capital Territory (difference 7.0) with the highest level of inequality between males and females found in South Australia (difference 10.82).

Children residing in the most disadvantaged areas (SEIFA IRSAD decile 1) in New South Wales and Tasmania recorded the same proportion of children developmentally vulnerable (27%) as those children residing in the middle of the SEIFA IRSAD range (decile 5) in Western Australia and the Australian Capital Territory and the lower end of the socioeconomic range (decile 8) in Queensland. Those children living in the most advantaged areas in Queensland (decile 10) recorded a similar proportion of children developmentally vulnerability as children residing in the poorer areas of NSW, Tasmania, South Australia and Victoria (deciles 2-3).

Despite acknowledged universal availability of health services in Australia, there is a marked variation in what the states and territories provide to families with young children. Table 5 shows the published schedules for maternal and child health services as well as preschool services offered within the different jurisdictions. These two services represent the main universal systems available to most Australian families. This table suggests that such services vary across the jurisdictions. While any statistical analyses of association are not possible with such broad data, a descriptive approach highlights the concordance with some of the results on the AEDI. Queensland, where the services are not universal, has the lowest preschool attendance and one of the highest children to staff ratios. New South Wales, Tasmania, and Victoria appear to have the most comprehensive universal early years' service coverage – and in two out of these three states (NSW and Tasmania) the level of inequality in child developmental vulnerability is the smallest.

Table 5: Documented universal services offered in each of the Australian jurisdictions prior to school.

|                              | Child, Health and Parenting schedule of Universal services |                                   |                                            | Preschool attendance in 2008 | Preschool staff to child ratio |
|------------------------------|------------------------------------------------------------|-----------------------------------|--------------------------------------------|------------------------------|--------------------------------|
|                              | 1-3 months                                                 | 4-12 months                       | 1 – 5 years                                |                              |                                |
| New South Wales              | <2 weeks (HV)<br>1-4 weeks<br>6-8 weeks                    | 6-months<br>12 months             | 18-months<br>2 years<br>3 years<br>4 years | 60.4%                        | 1:10                           |
| Australian Capital Territory | 1-4 weeks (HV)<br>6-8 weeks                                | 6-9 months                        | 18 -21 months<br>3 – 3.5 years             | 88.3%                        | 1:11                           |
| Queensland                   | No universal service                                       |                                   |                                            | 26.6%                        | 1:12                           |
| South Australia              | < 2 weeks (HV)                                             | - available by request            | - available by request                     | 87.9%                        | 1:10                           |
| Tasmania                     | 2 weeks (HV)<br>4 weeks<br>8 weeks                         | 4 months<br>8 months<br>12 months | 18 months<br>3 ½ years                     | 101.6%                       | 1:10                           |
| Victoria                     | < 2 weeks (HV)<br>2 weeks<br>4 weeks<br>8 weeks            | 4 months<br>8 months<br>12 months | 18 months<br>2 years<br>3 ½ years          | 95.8%                        | 1:15                           |
| Western Australia            | <10 days (HV)<br>6-8 weeks                                 | 3-4 months<br>8 months            | 18 months<br>3 years                       | 103.4%                       | 1:10                           |

HV = Home Visit. Note: States provide aggregated data for their preschool attendance rates and the Australian Bureau of Statistics provides data for the denominator, which is provided as the reason for percentages being over 100%. References for Table 5: [42-50].

## Discussion

Population-wide data has enabled Australia to be the first nation to quantify patterns of early child health and development across its different jurisdictional boundaries with their associated socioeconomic and demographic diversity. The work here provides the first national population benchmarks of some aspects of early childhood development as this pertains to readiness to learn at school. The data illuminate striking differences in early capacities that are strongly associated with socioeconomic and demographic circumstances.

Controlling for socioeconomic and demographic covariates reveals significant variations in developmental vulnerabilities across the states and territories. At the outset we acknowledge that there are socioeconomic and demographic determinants that are not fully captured by the models presented owing to their limited availability in the CURF. Nonetheless, it is both heartening and disturbing to discover such differences across jurisdictions. It is heartening because it highlights that child health and development may be improved by factors other than socioeconomic and demographic factors. However, it is disturbing to note that in a wealthy country where universal health coverage, mandated education and public health provision are available, and where there is still a reasonable social safety net, there are nevertheless striking disparities in levels of early child development. Why is it, for example, that after controlling for the standard socioeconomic and demographic factors, a child residing in Queensland relative to a child residing in New South Wales, has an increased odds of being developmentally vulnerable by the time they reach school entry (males OR 1.80, CI 1.74-1.87; females OR 1.52 CI 1.46-1.59)? There is little doubt that these differences would be reduced by more extensive socioeconomic and demographic controls but this is unlikely to explain all the residual differences within and across jurisdictions. This raises the question of whether differing policies, contexts and mix of services that support children and their families from birth to school age across the jurisdictions in Australia contribute to such inequalities? The marked variation demonstrated in Table 5 suggests this is a possibility.



1  
2 In South Australia (SA) the maternal and child health schedule moves quickly from a  
3  
4 universal to an active targeted service; however all mothers not in the targeted service who wish to  
5  
6 see a child health nurse can still visit the clinics. In SA almost all families have a Universal Contact  
7  
8 Visit within the first two weeks after birth of their baby. Based on the nurse's assessment, mothers  
9  
10 who have risk factors such as being young, socially isolated or having mental health issues are  
11  
12 offered further intensive home visits. These visits are extensive with weekly sessions between  
13  
14 week 3 and 8, followed by fortnightly visits up to 8 months, and then monthly visits until the child  
15  
16 is two years old. The targeted schedule includes a total of 34 visits in the first 2 years of the child's  
17  
18 life [43]. In Tasmania, ACT and NSW a universal home visit is also conducted and then the state  
19  
20 specific scheduled development checks for all families are offered. In Victoria, even though funded  
21  
22 by the State government, the services are delivered by local governments adding a different context  
23  
24 to the "shop front". NSW is the only state with an antenatal health check-up that identifies  
25  
26 vulnerable families early. These families are then referred onto secondary services where necessary  
27  
28 [51 52]. In WA, a universal service is offered in the first 10 days after birth and then nurses aim to  
29  
30 provide a total of six contacts [53]. In Queensland the government has no universal maternal and  
31  
32 child health service and Queensland is also the state with the lowest preschool attendance [48 50].  
33  
34  
35

36  
37 In addition to the variability across jurisdictions in the delivery of maternal and child health  
38  
39 services and the level of access to these services there are also differences in the rate of investment  
40  
41 in these services relative to population growth. For example in Western Australia service delivery  
42  
43 has not kept pace with the population growth. The Western Australia Children's Commissioner in a  
44  
45 submission to a Justice Standing Committee noted that although the birth rate had increased 16%  
46  
47 over the previous years there had not been a concomitant increase in the number of child health  
48  
49 nurses, school health nurses, Aboriginal health workers or investments in child health services. The  
50  
51 Commissioner's figures revealed that despite the published Child and Maternal Health Schedule  
52  
53 there was only one child health nurse for every 167 births (whereas most other jurisdictions had  
54  
55 ratios between 1:78 – 1:98) [49].  
56  
57  
58  
59  
60

1  
2 While it may be tempting to make strong claims about the co-variation in AEDI results with  
3 models and levels of human service delivery in the various Australian jurisdictions, a much more  
4 extensive investigation is required to move toward any causal interpretation. For example,  
5  
6 controlling for the covariates increases the odds of developmental vulnerability for children living  
7  
8 within the Australian Capital Territory. Just why this should be so, given the shallower  
9  
10 socioeconomic gradient in this jurisdiction (with no children recorded in the poorest 5 deciles of  
11  
12 SEIFA IRSAD), is unclear. Why then, despite the ACT being a relatively wealthy state with lower  
13  
14 socioeconomic inequality, do we see increased odds for vulnerability across all five of the  
15  
16 developmental domains?  
17  
18  
19  
20

21  
22 Gender differences are evident in these data. There are well documented gender differences  
23  
24 in brain development of young children [54 55]. At early ages in particular, boys develop at a  
25  
26 slower rate than girls [56], and there is evidence that different areas of the brain develop in a  
27  
28 different sequence in girls compared with most boys [57]. This is consistently evident within the  
29  
30 EDI [30] and AEDI results [18]. However within gender there are significant differences for boys  
31  
32 and girls residing in different jurisdictions, and socioeconomic and demographic contexts. What  
33  
34 are the contextual factors in South Australia that lead to both the greatest inequality difference  
35  
36 between males and females and also the greatest degree of inequality within the male gender  
37  
38 compared to other jurisdictions? This is in contrast to a smaller gap between boys and girls living  
39  
40 in Tasmania and New South Wales, and both of these jurisdictions show the lowest level of  
41  
42 inequality while still also maintaining lower levels of developmental vulnerability overall.  
43  
44  
45

46  
47 Across all five of the AEDI domains both Aboriginal and ESL children have increased odds  
48  
49 of vulnerability compared to non-Aboriginal and non-ESL children respectively. Of interest is that  
50  
51 the inequality between Aboriginal and non-Aboriginal children is greater for females than for males  
52  
53 particularly on the Physical health and wellbeing domain, where the odds ratio for male Aboriginal  
54  
55 children is 1.81 (CI 1.68-1.95) compared with 2.38 for female Aboriginal children (CI 2.19-2.58).  
56  
57 However the greatest inequality gap between Aboriginal and non-Aboriginal children is found on  
58  
59  
60

1 the language and cognitive development domain irrespective of gender (OR 2.59 males; 95% CI,  
2 2.42-2.78 and OR females 3.01; 95% CI, 2.78-3.25). Interestingly, although SEIFA IRSAD has a  
3 large impact on each of the five AEDI domains, it is the Language and cognitive domain that is  
4 influenced the greatest by the socio-economic index.  
5  
6  
7  
8  
9

10 For children with ESL status the highest ORs for vulnerability were found for the  
11 Communication skills and general knowledge domain with an OR of 4.19 for males (CI 4.01-4.37)  
12 and an OR of 5.16 for females (CI 4.89-5.44). The results need to be considered in light of the fact  
13 that the AEDI measures school based communication skills in English as English is the main  
14 language of instruction in Australian schools. Results reported elsewhere have shown that children  
15 who speak another language but are additionally proficient in English show the lowest levels of  
16 developmental vulnerabilities across each of the five domains, however those that are not proficient  
17 in English (independent of ESL status) show poorer results on the AEDI [18 58 59].  
18  
19  
20  
21  
22  
23  
24  
25  
26  
27

28 It is worth mentioning that the covariates ATSI and ESL do not show significant overlap.  
29 Of those children who are defined as ATSI, only 20% are classified as ESL. Whereas, of those  
30 children classified as ESL by the teacher, only 7% are defined as having ATSI status. In total less  
31 than 1% of the entire sample were both of ATSI decent and classified by the teachers as having  
32 English as a Second Language.  
33  
34  
35  
36  
37  
38

39 The AEDI will be repeated once every three years (i.e. 2012, 2015, 2018...). This will  
40 enable onward monitoring and surveillance and creates opportunities to examine the effects of  
41 policies and interventions. This will require political will and leadership as well as the capitalisation  
42 of this opportunity by the scientific community and those interested in human service evaluation.  
43 The onward implementation of the AEDI also encourages efforts in establishing a longitudinal  
44 capacity (i.e. following the same child/person over time) to illuminate the pathways leading to a  
45 variety of human development outcomes. Among such life course outcomes are those pertaining to  
46 health/ill-health as well as wider outcomes pertaining to social, economic and civic participation.  
47  
48  
49  
50  
51  
52  
53  
54  
55  
56  
57  
58  
59  
60

1  
2  
3  
4  
5  
6  
7  
8  
9  
10  
11  
12  
13  
14  
15  
16  
17  
18  
19  
20  
21  
22  
23  
24  
25  
26  
27  
28  
29  
30  
31  
32  
33  
34  
35  
36  
37  
38  
39  
40  
41  
42  
43  
44  
45  
46  
47  
48  
49  
50  
51  
52  
53  
54  
55  
56  
57  
58  
59  
60

In Australia there are robust administrative data linkage methodologies, some longstanding and well established, that are currently being assessed for their potential to use AEDI data to prospectively estimate the human development benefits of early childhood opportunities, environments and services on later life course outcomes. It is possible to construct crosswalks between health, early child development and education databases that integrate population-wide, person-specific data at national, provincial, and community levels [60]. As such it is possible to create a historical perspective of developmental trajectories for an entire population of children.

Australia is now progressing towards national data linkage with jurisdiction based “nodes” working together under a national network (the Population Health Research Network) that will allow researchers to access linked data that is de-identified. The systems will improve Australia’s ability to monitor health and health inequalities using data already collected by social services including primarily health but also education and family and community services. In Western Australia and New South Wales data linkage systems have been operating for over 10 years [61], however the national network with significant infrastructure investment from the federal and state governments aims to provide the world’s most comprehensive population health database to monitor and study health across the country [62]. The 2009 AEDI dataset is currently being linked into this national network of jurisdictional based nodes.

Currently there are a number of interventions aimed at improving child development that show demonstrated efficacy [15]. However, there is still insufficient data to inform policies and practices to reduce inequalities in early child development. With linked population data sets program/policy evaluation and economic models can also be investigated (such as the effectiveness of preventive interventions which are traditionally hard to quantify). Such systems will be invaluable tools for assessing the efficacy and effectiveness of policies and interventions that aim to reduce inequalities in health and development across populations [3].

The Early Development Instrument (EDI) is gaining attention internationally with the instrument now being utilized in over a dozen countries [35]. Part of the attraction is that the EDI is

1 administered just like a census and is a holistic measure of child health and development. Regular  
2  
3 monitoring of inequalities and use of these data for education, advocacy, and increased  
4  
5 accountability among the general public and decision makers is urgently needed, but alone will not  
6  
7 be sufficient [63]. Equity of opportunity and access must be a priority in the design of policies and  
8  
9 interventions. The AEDI provides a critical measure in a developmental stage that is otherwise  
10  
11 surprisingly uncharted in the life course trajectory given the contemporary claims placed on the  
12  
13 importance of optimising development at early points in life.  
14  
15  
16  
17  
18  
19  
20  
21  
22  
23  
24  
25  
26  
27  
28  
29  
30  
31  
32  
33  
34  
35  
36  
37  
38  
39  
40  
41  
42  
43  
44  
45  
46  
47  
48  
49  
50  
51  
52  
53  
54  
55  
56  
57  
58  
59  
60

**Acknowledgements:**

The 2009 AEDI data collection was conducted by the Centre for Community Child Health (at The Royal Children's Hospital Melbourne, and a key research centre at the Murdoch Childrens Research Institute) in partnership with the Telethon Institute for Child Health Research in Perth. The AEDI is funded by the Australian Government's Department of Education, Employment and Workplace Relations (DEEWR) who have also made the AEDI Confidentialised Unit Record File available to authors SB, JL, VC, SZ, SS, AG, MJ and SG.

**Competing Interest:** None to declare.

**Funding Statement:** SB, SG and TG's salaries are part supported by the Department of Education, Employment and Workplace Relations (DEEWR) to support the AEDI. JL is supported by a National Health and Medical Research Council, Australia Fellowship Award that supports AR and MM.

**Licence for Publication:** The Corresponding Author has the right to grant on behalf of all authors and does grant on behalf of all authors, an exclusive licence (or non-exclusive for government employees) on a worldwide basis to the BMJ Publishing Group Ltd and its Licensees to permit this article (if accepted) to be published in JECH editions and any other BMJPGJL products to exploit all subsidiary rights, as set out in our licence (<http://group.bmj.com/products/journals/instructions-for-authors/licence-forms/>)."

**Disclaimer:** The findings and views reported in this paper are those of the authors and should not be attributed to DEEWR, the Centre for Community Child Health or the Telethon Institute for Child Health Research.

1 **Contributor Authorship Statement:** SB, JL, SS, VC and SZ conceived the original idea and  
2  
3 structure of the paper. SB led and wrote the majority of the paper. AG and AR wrote the first draft  
4  
5 of the methods and results section, with AR, and MM and JL undertaking responsibility for the  
6  
7 analyses under direction by JL and SB. TG compiled the universal policy analyses. SG directed the  
8  
9 2009 AEDI data collection in conjunction with SB, SS and SZ. MJ and CH provided advocacy,  
10  
11 guidance and support to SB specifically, and to the Australian governments and local communities  
12  
13 in the design and implementation of the EDI as a census. All authors provided input to various  
14  
15 drafts of the paper. SB acts as the guarantor for the paper and takes responsibility for the integrity  
16  
17 of the work as a whole, from inception to published article.  
18  
19  
20  
21  
22  
23  
24  
25  
26  
27  
28  
29  
30  
31  
32  
33  
34  
35  
36  
37  
38  
39  
40  
41  
42  
43  
44  
45  
46  
47  
48  
49  
50  
51  
52  
53  
54  
55  
56  
57  
58  
59  
60



## References

1. Lynch JW, Davey-Smith G. A Life Course Approach to Chronic Disease Epidemiology. *Annu. Rev. Public Health* 2005;**26**(1):1-35 doi: doi:10.1146/annurev.publhealth.26.021304.144505[published Online First: Epub Date].
2. Marmot M. Fair Society, Healthy Lives: The Marmot Review: The Marmot Review, 2010.
3. Lynch JW, Law C, Brinkman S, et al. Inequalities in child healthy development: Some challenges for effective implementation. *Soc. Sci. Med.* 2010;**71**(7):1219-374
4. Hertzman C, Boyce T. How Experience Gets Under the Skin to Create Gradients in Developmental Health. *Annu. Rev. Public Health* 2010;**31**:329-47 doi: 10.1146/annurev.publhealth.012809.103538[published Online First: Epub Date].
5. Heckman J. Schools, Skills, and Synapses. *Economic Inquiry* 2008;**46**(3):289-324
6. UNICEF. The State of The Worlds Children: Downloadable Statistical Tables. Secondary The State of The Worlds Children: Downloadable Statistical Tables 11/8/2010 2010. <http://www.unicef.org/rightsite/sowc/statistics.php>.
7. OECD. OECD Programme for International Student Assessment (PISA). Secondary OECD Programme for International Student Assessment (PISA) 2012. [www.pisa.oecd.org](http://www.pisa.oecd.org).
8. United Nations Development Programme. The Millennium Development Goals: Progress Reversals and Challenges. New York, 2002.
9. UNESCO. Strong Foundations Early Childhood Care and Education. Secondary Strong Foundations Early Childhood Care and Education 2007. <http://unesdoc.unesco.org/images/0014/001477/147785E.pdf>.
10. Young ME. *Early Child Development: From Measurement to Action*. Washington DC., USA: The World Bank, 2007.
11. Status of the Convention on the Rights of the Child. Report of the Secretary-General. United Nations General Assembly. Sixty-fifth session ed: United Nations, 2010:18.
12. Janus M, Duku E. The school entry gap: Socioeconomic, family, and health factors associated with children's school readiness to learn. *Early Education & Development* 2007;**18**(3):375-403
13. Meisels SJ. Developmental Screening in Early Childhood: The Interaction of Research and Social Policy. *Annu. Rev. Public Health* 1988;**9**(1):527-50 doi: doi:10.1146/annurev.pu.09.050188.002523[published Online First: Epub Date].
14. Meisels SJ. Can Developmental Screening Tests Identify Children Who Are Developmentally at Risk? *Pediatrics* 1989;**83**(4):578-85
15. Barnett WS. Effectiveness of Early Educational Intervention. *Science* 2011;**333**(6045):975-78 doi: 10.1126/science.1204534[published Online First: Epub Date].
16. Goldfeld S, Sayers M, Brinkman S, et al. The process and policy challenges of adapting and implementing the Early Development Instrument in Australia. *Early Education and Development* 2009;**20**(6):978-91
17. Janus M, Brinkman S, Duku E, et al. *The Early Development Instrument: A population-based measure for communities. A handbook on development, properties and use*. Hamilton, Ontario, Canada: Offord Centre for Child Studies, 2007.
18. Centre for Community Child Health and Telethon Institute for Child Health Research. *A Snapshot of Early Childhood Development in Australia. Australian Early Development Index (AEDI) National Report 2009*. Canberra: Australian Government, 2009.
19. Hertzman C, Williams R. Making Early Childhood Count. *Can. Med. Assoc. J.* 2009;**180**:68-71
20. OECD. OECD.StatExtracts. Health Expenditure and Financing: OECD, 2008.
21. Australian Bureau of Statistics. 3101.0 - Australian Demographic Statistics. June 2011. Canberra: Australian Bureau of Statistics, 2011.



- 1 22. Steering Committee for the Review of Government Service Provision. Overcoming Indigenous  
2 Disadvantage: Key Indicators 2011. 2011.  
3 [http://www.pc.gov.au/\\_data/assets/pdf\\_file/0018/111609/key-indicators-2011-report.pdf](http://www.pc.gov.au/_data/assets/pdf_file/0018/111609/key-indicators-2011-report.pdf)  
4 (accessed 1/1/2012).  
5
- 6 23. Australian Bureau of Statistics. 1301.0 - Year Book Australia, 2009-10. Canberra: Australian  
7 Bureau of Statistics, 2010.
- 8 24. Atkinson AB, Piketty P, Saez E. Top Incomes in the Long Run History. *Journal of Economic*  
9 *Literature* 2011;**49**(1):3-71
- 10 25. United Nations Development Programme. Human Development Report 2011. Sustainability and  
11 Equity: A Better Future for All. New York: Palgrave Macmillan, 2011.
- 12 26. Silburn S, Zubrick SR, De Maio JA, et al. The Western Australian Aboriginal Child Health  
13 Survey: Strengthening the Capacity of Aboriginal Children, Families and Communities.  
14 Perth: Curtin University of Technology and the Telethon Institute for Child Health  
15 Research., 2006.
- 16 27. Centre for Community Child Health. AEDI Research CURF: Australian Government, 2011.
- 17 28. Centre for Community Child Health. Australian Early Development Index: Data Users Guide:  
18 Australian Government, 2010.
- 19 29. Australian Bureau of Statistics. 3201.0 - Population by Age and Sex, Australian States and  
20 Territories, Jun 2009. Canberra: Australian Bureau of Statistics, 2009.
- 21 30. Janus M, Offord D. Development and psychometric properties of the Early Development  
22 Instrument (EDI): A measure of children's school readiness. *Canadian Journal of*  
23 *Behavioural Science* 2007;**39**:1-22
- 24 31. Brinkman S, Gregory T, Harris J, et al. Associations between the early development instrument  
25 at age 5 and reading and numeracy skills at ages 8, 10 and 12: a prospective linked data  
26 study. *Australian and New Zealand Journal of Public Health* 2012;**in press**
- 27 32. Brinkman S, Silburn S, Lawrence D, et al. Investigating the validity of the Australian Early  
28 Development Index. *Early Education and Development* 2007;**18** (3):427-51
- 29 33. Brinkman S, Zubrick S, Silburn S. Predictive Validity of a school readiness assessment on later  
30 cognitive and behavioral outcomes. *Journal of Early Education and Development* 2012;**in**  
31 **press**
- 32 34. Forget-Dubois N, Lemelin JP, Boivin M, et al. Predicting early school achievement with the  
33 EDI: A longitudinal population-based study. *Early Education and Development*  
34 2007;**18**(3):405-26
- 35 35. Janus M, Brinkman SA, Duku E. Validity and psychometric properties of the Early  
36 Development Instrument in Canada, Australia, United States and Jamaica. *Social Indicators*  
37 *Research* 2011;**103**(2):283-97
- 38 36. Centre for Community Child Health and Telethon Institute for Child Health Research. AEDI  
39 Guide for Teachers. Canberra: Centre for Community Child Health and Telethon Institute  
40 for Child Health Research, 2009.
- 41 37. Australian Bureau of Statistics. Information Paper: An Introduction to Socio-Economic Indexes  
42 for Areas (SEIFA): Australian Government, 2008.
- 43 38. Radisich P, Wise P. Socio-Economic Indexes For Areas: Robustness, Diversity Within Larger  
44 Areas and the New Geography Standard. Research Paper. Canberra: Australian Bureau of  
45 Statistics,, 2012.
- 46 39. Centre for Community Child Health and Telethon Institute for Child Health Research. AEDI  
47 Technical Paper No 1: Children developmentally vulnerable on one or more and two or  
48 more, AEDI domains: Australian Government, 2011.
- 49 40. Wagstaff A, Paci P, van Doorslaer E. On the measurement of inequalities in health. *Soc. Sci.*  
50 *Med.* 1991;**33**(5):545-57 doi: 10.1016/0277-9536(91)90212-u[published Online First: Epub  
51 Date]].  
52  
53  
54  
55  
56  
57  
58  
59  
60

- 1 41. Harper S, Lynch JW. Methods for Measuring Cancer Disparities: Using Data Relevant to  
2 Healthy People 2010 Cancer-Related Objectives. NCI Cancer Surveillance Monograph  
3 Series, Number 6. Bethesda: National Cancer Institute, 2005:1-80.
- 4 42. ACT Health. Australian Capital Territory Immunisation Strategy (2007-2010), 2007.
- 5 43. Children Youth and Women's Health Service. Family Home Visiting: Service Outline, 2005.
- 6 44. Department of Education and Early Childhood Development. Your Maternal and Child Health  
7 Service Visits. Secondary Your Maternal and Child Health Service Visits 2011.  
8 <http://www.education.vic.gov.au/earlychildhood/mch/visits.htm>.
- 9 45. Department of Health and Human Services. Child Health Centres. Secondary Child Health  
10 Centres 2011.  
11 [http://www.dhhs.tas.gov.au/service\\_information/services\\_files/child\\_health\\_centres](http://www.dhhs.tas.gov.au/service_information/services_files/child_health_centres).
- 12 46. NSW Department of Health. Personal Health Record (The Blue Book). Secondary Personal  
13 Health Record (The Blue Book) 2011.  
14 [http://www.health.nsw.gov.au/policies/ib/2007/IB2007\\_008.html](http://www.health.nsw.gov.au/policies/ib/2007/IB2007_008.html).
- 15 47. Office of Early Childhood Education and Care. Child and Family Support Hubs. Secondary  
16 Child and Family Support Hubs 2011. [http://deta.qld.gov.au/earlychildhood/families/ey-  
17 services/support-hubs.html](http://deta.qld.gov.au/earlychildhood/families/ey-services/support-hubs.html).
- 18 48. Dowling A, O'Malley K. Preschool Education in Australia. Melbourne: Australian Council for  
19 Educational Research, 2009.
- 20 49. Commissioner for Children and Young People. Submission to the Community Development and  
21 Justice Standing Committee; Inquiry into the Adequacy of Services to Meet the  
22 Developmental Needs of Western Australia's Children. Perth, 2009.
- 23 50. Hirst C. Re-Birthing. Report of the Review of Maternity Services in Queensland. Brisbane:  
24 Department of Health, Queensland, 2005.
- 25 51. Families NSW. Safe Start. Secondary Safe Start 2011.  
26 [http://www.families.nsw.gov.au/getting\\_help\\_and\\_support/safe\\_start.html](http://www.families.nsw.gov.au/getting_help_and_support/safe_start.html).
- 27 52. Families NSW. Health home visiting & early childhood health services. Secondary Health home  
28 visiting & early childhood health services 2011.  
29 [http://www.families.nsw.gov.au/getting\\_help\\_and\\_support/health\\_home\\_visiting.html](http://www.families.nsw.gov.au/getting_help_and_support/health_home_visiting.html).
- 30 53. Commissioner for Children and Young People. Submission to the Education and Health Standing  
31 Committee: Review of WA's Current and Future Hospital and Community Health Care  
32 Services. Perth: Government of Western Australia., 2009.
- 33 54. Anokhin AP, Lutzenberger W, Nikolaev A, Birbaumer N. Complexity of electrocortical  
34 dynamics in children: developmental aspects. *Developmental Psychobiology* 2000;**36**(1):9-  
35 22
- 36 55. Hanlon H, Thatcher R, Cline M. Gender differences in the development of EEG coherence in  
37 normal children. *Developmental Neuropsychology* 1999;**16**(3):479-506
- 38 56. Bornstein M, Hahn C, Haynes O. Specific and general language performance across early  
39 childhood: Stability and gender considerations. *First Language* 2004;**24**(3):267-304
- 40 57. Weinberg MK, Tronick EZ, Cohn JF, et al. Gender differences in emotional expressivity and  
41 self-regulation during early infancy. *Developmental Psychology* 1999;**35**:175-88
- 42 58. Brinkman S, Sayers M, Goldfeld S, et al. Population monitoring of language and cognitive  
43 development in Australia: The Australian Early Development Index. *International Journal of  
44 Speech-Language Pathology* 2009;**11** (5):1-12
- 45 59. Janus M, Hertzman C, Guhn M, Brinkman S, Goldfeld S. Reply to Li, D'Angiulli and Kendall:  
46 The Early Development Index and children from culturally and linguistically diverse  
47 backgrounds. *Early Years: An International Journal of Research and Development*  
48 2009;**29**(1):31-35
- 49 60. Jutte DP, Roos LL, Brownell MD. Administrative Record Linkage as a Tool for Public Health  
50 Research. *Annu. Rev. Public Health* 2011;**32**:91-108

- 1  
2  
3  
4  
5  
6  
7  
8  
9  
10  
11  
12  
13  
14  
15  
16  
17  
18  
19  
20  
21  
22  
23  
24  
25  
26  
27  
28  
29  
30  
31  
32  
33  
34  
35  
36  
37  
38  
39  
40  
41  
42  
43  
44  
45  
46  
47  
48  
49  
50  
51  
52  
53  
54  
55  
56  
57  
58  
59  
60
61. Holman C, Bass A, Rosman D, et al. A decade of data linkage in Western Australia: strategic design, applications and benefits of the WA data linkage system. *Aust. Health Rev.* 2008;**32**:766 - 77
  62. PHRN. Population Health Research Network. Secondary Population Health Research Network 2011. [www.phrn.org.au](http://www.phrn.org.au).
  63. Victora CG, Wagstaff A, Schellenberg JA, Gwatkin D, Claeson M, Habicht J. Applying an equity lens to child health and mortality: more of the same is not enough. *Lancet* 2003;**362**(9379):233-41 doi: 10.1016/s0140-6736(03)13917-7[published Online First: Epub Date]].

For peer review only

Figure 1: Flow chart of participants

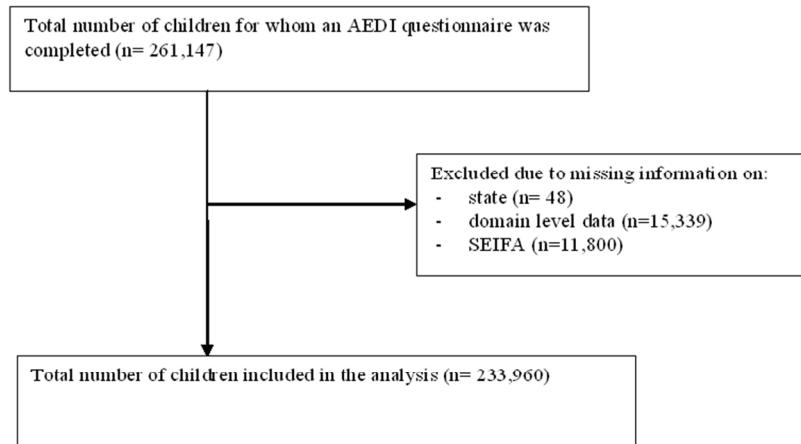

248x173mm (96 x 96 DPI)

1  
2  
3  
4  
5  
6  
7  
8  
9  
10  
11  
12  
13  
14  
15  
16  
17  
18  
19  
20  
21  
22  
23  
24  
25  
26  
27  
28  
29  
30  
31  
32  
33  
34  
35  
36  
37  
38  
39  
40  
41  
42  
43  
44  
45  
46  
47  
48  
49  
50  
51  
52  
53  
54  
55  
56  
57  
58  
59  
60

Figure 2: Adjusted\* prevalence of vulnerability (%) on one or more AEDI domains and absolute socioeconomic inequality (%) by jurisdiction.

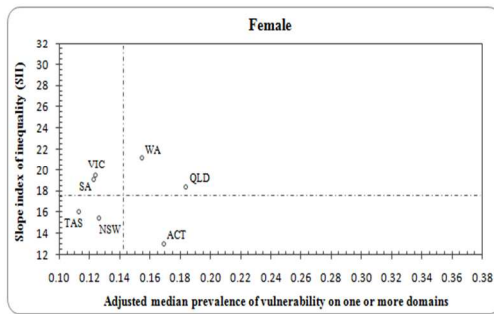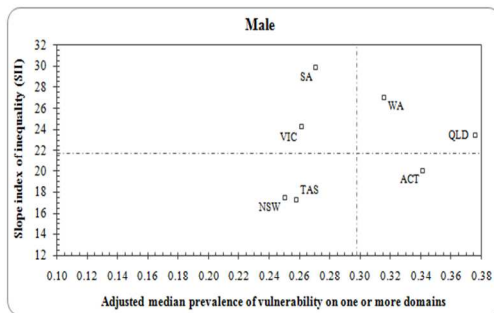

\* Mean prevalence is adjusted for ATSI, ESL and SEIFA IRSAD

\*\*Dotted lines indicate national median vulnerability (%) and absolute socioeconomic inequality (%).

209x297mm (300 x 300 DPI)

STROBE 2007 (v4) Statement—Checklist of items that should be included in reports of *cross-sectional studies*

| Section/Topic                | Item # | Recommendation                                                                                                                                                                                               | Reported on page # |
|------------------------------|--------|--------------------------------------------------------------------------------------------------------------------------------------------------------------------------------------------------------------|--------------------|
| Title and abstract           | 1      | (a) Indicate the study's design with a commonly used term in the title or the abstract<br><i>Completed - Census of child development</i>                                                                     | 1 & 4              |
|                              |        | (b) Provide in the abstract an informative and balanced summary of what was done and what was found<br><i>Completed</i>                                                                                      | 4                  |
| <b>Introduction</b>          |        |                                                                                                                                                                                                              |                    |
| Background/rationale         | 2      | Explain the scientific background and rationale for the investigation being reported<br><i>Completed</i>                                                                                                     | 5-9                |
| Objectives                   | 3      | State specific objectives, including any prespecified hypotheses<br><i>Objectives stated</i>                                                                                                                 | 9                  |
| <b>Methods</b>               |        |                                                                                                                                                                                                              |                    |
| Study design                 | 4      | Present key elements of study design early in the paper<br><i>Census of child development</i>                                                                                                                |                    |
| Setting                      | 5      | Describe the setting, locations, and relevant dates, including periods of recruitment, exposure, follow-up, and data collection<br><i>Completed</i>                                                          | 9-10               |
| Participants                 | 6      | (a) Give the eligibility criteria, and the sources and methods of selection of participants<br><i>Completed</i>                                                                                              | 9-10               |
| Variables                    | 7      | Clearly define all outcomes, exposures, predictors, potential confounders, and effect modifiers. Give diagnostic criteria, if applicable<br><i>Completed</i>                                                 | 12-13              |
| Data sources/<br>measurement | 8*     | For each variable of interest, give sources of data and details of methods of assessment (measurement). Describe comparability of assessment methods if there is more than one group<br><i>Completed</i>     | 12-13              |
| Bias                         | 9      | Describe any efforts to address potential sources of bias<br><i>No attempt has been made to address any potential source of bias – the census collected an estimated 97.5% of the 5 year old population.</i> | n/a                |

| Section/Topic          | Item # | Recommendation                                                                                                                                                                                    | Reported on page # |
|------------------------|--------|---------------------------------------------------------------------------------------------------------------------------------------------------------------------------------------------------|--------------------|
| Study size             | 10     | Explain how the study size was arrived at<br><i>Not applicable - census</i>                                                                                                                       | n/a                |
| Quantitative variables | 11     | Explain how quantitative variables were handled in the analyses. If applicable, describe which groupings were chosen and why<br><i>Completed</i>                                                  | 13                 |
| Statistical methods    | 12     | (a) Describe all statistical methods, including those used to control for confounding<br><i>Completed</i>                                                                                         | 13-15              |
|                        |        | (b) Describe any methods used to examine subgroups and interactions<br><i>Completed</i>                                                                                                           | 13-15              |
|                        |        | (c) Explain how missing data were addressed<br><i>Completed</i>                                                                                                                                   | 13                 |
|                        |        | (d) If applicable, describe analytical methods taking account of sampling strategy<br><i>Not applicable - census</i>                                                                              | n/a                |
|                        |        | (e) Describe any sensitivity analyses<br><i>None</i>                                                                                                                                              | -                  |
| <b>Results</b>         |        |                                                                                                                                                                                                   |                    |
| Participants           | 13*    | (a) Report numbers of individuals at each stage of study—eg numbers potentially eligible, examined for eligibility, confirmed eligible, included in the study, completing follow-up, and analysed | 10-11              |
|                        |        | (b) Give reasons for non-participation at each stage                                                                                                                                              |                    |
|                        |        | (c) Consider use of a flow diagram<br><i>Flow diagram presented</i>                                                                                                                               | Figure file        |
| Descriptive data       | 14*    | (a) Give characteristics of study participants (eg demographic, clinical, social) and information on exposures and potential confounders<br><i>Completed</i>                                      | 10                 |
|                        |        | (b) Indicate number of participants with missing data for each variable of interest<br><i>Completed</i>                                                                                           |                    |
| Outcome data           | 15*    | Report numbers of outcome events or summary measures<br><i>Completed</i>                                                                                                                          |                    |

| Section/Topic            | Item # | Recommendation                                                                                                                                                                                                                   | Reported on page # |
|--------------------------|--------|----------------------------------------------------------------------------------------------------------------------------------------------------------------------------------------------------------------------------------|--------------------|
| Main results             | 16     | (a) Give unadjusted estimates and, if applicable, confounder-adjusted estimates and their precision (eg, 95% confidence interval). Make clear which confounders were adjusted for and why they were included<br><b>Completed</b> | 16, 18 & 19        |
|                          |        | (b) Report category boundaries when continuous variables were categorized<br><b>Completed</b>                                                                                                                                    |                    |
|                          |        | (c) If relevant, consider translating estimates of relative risk into absolute risk for a meaningful time period<br><b>Not applicable</b>                                                                                        | n/a                |
| Other analyses           | 17     | Report other analyses done—eg analyses of subgroups and interactions, and sensitivity analyses<br><b>Completed</b>                                                                                                               | 20-21              |
| <b>Discussion</b>        |        |                                                                                                                                                                                                                                  |                    |
| Key results              | 18     | Summarise key results with reference to study objectives<br><b>Completed</b>                                                                                                                                                     | 23                 |
| Limitations              | 19     | Discuss limitations of the study, taking into account sources of potential bias or imprecision. Discuss both direction and magnitude of any potential bias<br><b>Completed</b>                                                   |                    |
| Interpretation           | 20     | Give a cautious overall interpretation of results considering objectives, limitations, multiplicity of analyses, results from similar studies, and other relevant evidence<br><b>Completed</b>                                   |                    |
| Generalisability         | 21     | Discuss the generalisability (external validity) of the study results<br><b>Completed</b>                                                                                                                                        |                    |
| <b>Other information</b> |        |                                                                                                                                                                                                                                  |                    |
| Funding                  | 22     | Give the source of funding and the role of the funders for the present study and, if applicable, for the original study on which the present article is based<br><b>Completed</b>                                                | 29                 |

\*Give information separately for cases and controls in case-control studies and, if applicable, for exposed and unexposed groups in cohort and cross-sectional studies.

**Note:** An Explanation and Elaboration article discusses each checklist item and gives methodological background and published examples of transparent reporting. The STROBE checklist is best used in conjunction with this article (freely available on the Web sites of PLoS Medicine at <http://www.plosmedicine.org/>, Annals of Internal Medicine at <http://www.annals.org/>, and Epidemiology at <http://www.epidem.com/>). Information on the STROBE Initiative is available at [www.strobe-statement.org](http://www.strobe-statement.org).
